# Supplementary material
Source: publisher figshare collection journal article supplement (https://gsajournals.figshare.com/ndownloader/files/37851000)
Supplement: Supplementary file 1 [file 37851000]

## Sheet: Field data
	SPS2017Frep1	SPS2017Frep2	SPS2017Frep3	SPS2017Favg	KPS2017Frep1	KPS2017Frep2	KPS2017Frep3	KPS2017Favg	GWS2017Frep1	GWS2017Frep2	GWS2017Frep3	GWS2017Favg	TKW2017Frep1	TKW2017Frep2	TKW2017Frep3	TKW2017Favg	DTHF2017rep1	DTHF2017rep2	DTHF2017rep3	DTHF2017avg	PHTF2017rep1	PHTF2017rep2	PHTF2017rep3	PHTF2017avg	Area2017rep1	Area2017rep2	Area2017rep3	Area2017avg	Width2017rep1	Width2017rep2	Width2017rep3	Width2017avg	Length2017rep1	Length2017rep2	Length2017rep3	Length2017avg	Circularity2017rep1	Circularity2017rep2	Circularity2017rep3	Circularity2017avg	L/WRatio2017rep1	L/WRatio2017rep2	L/WRatio2017rep3	L/WRatio2017avg	SPS2019Frep1	SPS2019Frep2	SPS2019Frep3	SPS2019Favg	DTH2019Frep1
DP527-001	17.25	15.125	19.125	17.1667	30.375	24.5	32.625	29.1667	1.5415	1.22762	1.68463	1.48458	50.749	50.1071	51.636	50.8307	63	62	65	63.3333	97	92	101	96.6667	21.7	21.3	21.7	21.6	3.5	3.5	3.5	3.5	8.4	8.3	8.3	8.3	1.5	1.5	1.5	1.5	2.4	2.4	2.4	2.4	16.875	20.875	21.875	19.875	68
DP527-002	19.375	19.25	19.75	19.4583	30.25	32.625	31.25	31.375	1.65187	1.83062	1.73962	1.74071	54.6074	56.1111	55.668	55.4622	62	62	62	62	117	108	115	113.333	22.4	22.4	22.7	22.5	3.6	3.6	3.6	3.6	8.8	8.9	8.9	8.8	1.6	1.6	1.6	1.6	2.5	2.5	2.5	2.5	23.125	22	21.8571	22.3274	55
DP527-003	17.125	16.125	19.375	17.5417	32.25	33.625	38	34.625	1.38763	1.51113	1.62375	1.5075	43.0271	44.9405	42.7303	43.566	63	61	65	63	98	104	108	103.333	18.7	18.9	18.6	18.7	3.3	3.4	3.3	3.3	7.8	7.7	7.7	7.7	1.5	1.5	1.5	1.5	2.4	2.3	2.3	2.3	20.25	20.375	21.625	20.75	67
DP527-004	24.625	22.625	24.25	23.8333	38	34.5	37.625	36.7083	2.1475	1.95175	2.13675	2.07867	56.5132	56.5725	56.7907	56.6254	64	63	64	63.6667	129	128	136	131	23.3	23	23	23.1	3.5	3.4	3.5	3.5	9.3	9.3	9.3	9.3	1.7	1.7	1.7	1.7	2.7	2.7	2.7	2.7	25	26.5	25.375	25.625	60
DP527-005	19.25	17.375	19.5	18.7083	36.875	38.625	43.875	39.7917	1.66213	1.71625	1.97362	1.784	45.0746	44.4337	44.9829	44.8304	63	64	65	64	104	109	117	110	19	19.3	19.3	19.2	3.3	3.3	3.3	3.3	7.9	7.9	7.8	7.9	1.5	1.5	1.5	1.5	2.4	2.4	2.4	2.4	18	19	21.75	19.5833	85
DP527-006	20.75	21.125	21.375	21.0833	41.625	47.5	36.625	41.9167	2.08237	2.42212	1.80525	2.10325	50.027	50.9921	49.2901	50.1031	66	68	66	66.6667	117	113	124	118	21.8	21.9	21.5	21.8	3.5	3.6	3.5	3.5	8.5	8.4	8.5	8.4	1.6	1.5	1.6	1.5	2.4	2.4	2.4	2.4	20.75	20.375	19.8333	20.3194	78
DP527-007	18	15.375	18	17.125	35.375	30.375	45	36.9167	1.5465	1.54462	2.30225	1.79779	43.7173	50.8519	51.1611	48.5768	66	63	66	65	98	98	103	99.6667	19.5	21.2	20.8	20.5	3.3	3.5	3.5	3.4	8	8.1	8	8	1.6	1.5	1.5	1.5	2.5	2.3	2.3	2.4	21	23.25	22.625	22.2917	77
DP527-008	20.25	19.4286	19.5	19.7262	37.5	42.1429	33.75	37.7976	1.85163	2.17529	1.71075	1.91255	49.3767	51.6169	50.6889	50.5608	67	68	68	67.6667	112	118	114	114.667	22	23	22.6	22.5	3.4	3.5	3.4	3.4	9	9.1	9.2	9.1	1.6	1.6	1.7	1.6	2.6	2.6	2.7	2.7	18.75	18.75	19.5	19	81
DP527-009	17.625	17.25	17.75	17.5417	29.625	32.5	31.5	31.2083	1.43925	1.64688	1.55537	1.54717	48.5823	50.6731	49.377	49.5441	67	67	68	67.3333	113	117	118	116	20.8	21.2	21.4	21.1	3.5	3.6	3.6	3.6	8.1	8.1	8.1	8.1	1.5	1.5	1.5	1.5	2.3	2.3	2.3	2.3	18.75	NA	NA	18.75	NA
DP527-010	17	14.875	18.625	16.8333	23.25	20.25	28.375	23.9583	0.9875	0.84075	1.22087	1.01638	42.4731	41.5185	43.0264	42.3394	70	67	70	69	98	92	111	100.333	20.2	20.2	21.3	20.6	3.2	3.2	3.3	3.2	8.9	8.8	9.1	8.9	1.7	1.7	1.7	1.7	2.7	2.7	2.8	2.8	17.625	17.5	17.625	17.5833	71
DP527-011	21	18.875	19.6	19.825	32.25	28.25	11.4	23.9667	1.77075	1.531	0.3356	1.21245	54.907	54.1947	29.4386	46.1801	66	65	83	71.3333	102	108	102	104	25	24	18.6	22.5	3.5	3.4	3.1	3.3	9.7	9.4	8.3	9.1	1.7	1.7	1.8	1.7	2.8	2.8	2.7	2.8	NA	NA	NA	NA	NA
DP527-012	21	19.75	21.25	20.6667	33.25	26.75	36	32	1.79337	1.5285	2.02738	1.78308	53.9361	57.1402	56.316	55.7974	67	63	67	65.6667	112	111	121	114.667	23.4	23.8	23.9	23.7	3.4	3.5	3.5	3.5	9.4	9.3	9.4	9.4	1.7	1.7	1.7	1.7	2.8	2.7	2.7	2.7	23.25	26.75	26.125	25.375	84
DP527-013	20.5	17.875	20	19.4583	33	27.875	31.875	30.9167	1.74487	1.28925	1.37187	1.46867	52.875	46.2511	43.0392	47.3884	67	65	66	66	94	85	97	92	22.1	20.1	19.5	20.6	3.6	3.4	3.3	3.4	8.6	8.1	8	8.2	1.6	1.5	1.6	1.5	2.4	2.4	2.4	2.4	15	17.625	21.125	17.9167
DP527-014	20.875	17.25	21	19.7083	34.125	30.125	32.875	32.375	1.72263	1.581	1.64437	1.64933	50.4799	52.4813	50.019	50.9934	68	66	68	67.3333	127	123	118	122.667	21.4	22.1	21.1	21.5	3.6	3.6	3.5	3.6	8.4	8.6	8.4	8.5	1.5	1.6	1.6	1.6	2.4	2.4	2.4	2.4	24	23.25	24.375	23.875	85
DP527-015	20.375	20.25	22.625	21.0833	38.75	39.5	38.625	38.9583	2.01525	1.97837	1.77825	1.92396	52.0065	50.0854	46.0388	49.3769	66	64	66	65.3333	98	96	100	98	22	21.9	21.5	21.8	3.4	3.4	3.3	3.4	9.1	9	9	9	1.7	1.7	1.7	1.7	2.7	2.7	2.7	2.7	19.875	17.75	20.125	19.25	71
DP527-016	19.625	18.5	21.625	19.9167	31	32	39	34	1.449	1.61462	2.0185	1.69404	46.7419	50.457	51.7564	49.6518	66	64	66	65.3333	126	118	128	124	20	21.3	21.7	21	3.4	3.5	3.5	3.4	8.1	8.5	8.6	8.4	1.5	1.6	1.6	1.6	2.4	2.5	2.5	2.4	26	25.625	23.875	25.1667	NA
DP527-017	21.75	20.75	21.875	21.4583	34.625	32.5	36.625	34.5833	1.91362	1.87825	2.111	1.96762	55.2671	57.7923	57.6382	56.8992	64	60	61	61.6667	126	112	124	120.667	23.7	23.9	24.1	23.9	3.6	3.6	3.6	3.6	9.5	9.5	9.5	9.5	1.7	1.7	1.7	1.7	2.7	2.7	2.6	2.7	20.375	18.875	19.5	19.5833	68
DP527-018	23.875	20.25	25.125	23.0833	39.625	42	43.125	41.5833	2.07325	2.42325	2.31438	2.27029	52.3218	57.6964	53.6667	54.5616	68	66	68	67.3333	120	108	111	113	23	24.1	23.3	23.5	3.5	3.6	3.6	3.5	9.4	9.5	9.3	9.4	1.7	1.7	1.7	1.7	2.7	2.7	2.6	2.7	21.25	21.375	23.3333	21.9861	85
DP527-019	26.375	23.125	23.75	24.4167	35.5	34.875	37	35.7917	1.76825	1.8855	1.98875	1.88083	49.8099	54.0645	53.75	52.5415	73	67	70	70	138	124	125	129	22.2	22.7	22.7	22.5	3.4	3.5	3.5	3.5	9.2	9.1	9.2	9.2	1.7	1.6	1.7	1.7	2.7	2.6	2.7	2.7	23.375	22.3333	NA	22.8542	NA
DP527-020	17.875	16.625	18	17.5	21.125	20.75	21.75	21.2083	0.97925	0.857	1.0425	0.959583	46.355	41.3012	47.931	45.1958	66	63	64	64.3333	103	103	97	101	21.1	20.7	21.2	21	3.5	3.4	3.5	3.5	8.3	8.3	8.4	8.4	1.6	1.6	1.6	1.6	2.4	2.5	2.5	2.5	17	17.5	19.5	18	69
DP527-021	19.875	18.125	19.375	19.125	33.625	28.5	32.875	31.6667	1.8155	1.57737	1.78363	1.7255	53.9926	55.3465	54.2548	54.5313	65	62	64	63.6667	110	100	106	105.333	22.8	23.3	23.5	23.2	3.3	3.3	3.3	3.3	9.4	9.6	9.5	9.5	1.7	1.7	1.7	1.7	2.8	2.9	2.9	2.9	20.625	20.5	19.25	20.125	69
DP527-022	20.375	18.75	22.125	20.4167	33.75	27.875	40.125	33.9167	1.92037	1.60712	2.31125	1.94625	56.9	57.6547	57.6012	57.3853	62	60	63	61.6667	115	105	118	112.667	23.7	24.3	24.1	24	3.6	3.6	3.6	3.6	9.2	9.3	9.2	9.2	1.6	1.6	1.6	1.6	2.6	2.6	2.6	2.6	23	21.125	22.75	22.2917	56
DP527-023	20.25	17.25	19.375	18.9583	33.75	29.625	35.125	32.8333	1.48425	1.42538	1.56875	1.49279	43.9778	48.1139	44.6619	45.5845	67	64	68	66.3333	119	119	113	117	19.7	20.8	20.6	20.4	3.2	3.4	3.4	3.3	8.5	8.6	8.5	8.5	1.6	1.6	1.6	1.6	2.6	2.5	2.5	2.6	20	19.625	22	20.5417	67
DP527-024	21.75	20.875	22.125	21.5833	39	37.125	35.625	37.25	1.9205	1.87488	1.5135	1.76963	49.2436	50.5017	42.4842	47.4098	70	66	71	69	121	117	118	118.667	21.4	21.8	20.2	21.1	3.3	3.3	3.2	3.3	9	9	8.7	8.9	1.7	1.7	1.7	1.7	2.7	2.7	2.8	2.7	19.875	19.625	20.875	20.125	90
DP527-025	20.125	16.875	18.5	18.5	32.75	30.5	35.625	32.9583	1.6005	1.51588	1.68312	1.59983	48.8702	49.7008	47.2456	48.6056	80	67	68	71.6667	114	110	114	112.667	20.7	20.9	21.1	20.9	3.4	3.5	3.5	3.5	8.3	8.4	8.4	8.4	1.5	1.5	1.6	1.5	2.4	2.4	2.5	2.4	19.625	20.125	21	20.25	69
DP527-026	20.625	20.375	20.25	20.4167	34.25	34.75	33.5	34.1667	1.67237	1.84	1.29987	1.60408	48.8285	52.9496	38.8022	46.8601	68	65	68	67	118	103	103	108	21.1	21.7	19.7	20.8	3.5	3.6	3.3	3.5	8.3	8.4	8.2	8.3	1.5	1.5	1.6	1.6	2.4	2.4	2.5	2.4	21.875	21.5	21.625	21.6667	78
DP527-027	19.875	18.375	18.875	19.0417	30.625	29.875	32.375	30.9583	1.53113	1.51287	1.72237	1.58879	49.9959	50.6402	53.2008	51.279	60	57	59	58.6667	111	97	116	108	21.6	21.6	22.2	21.8	3.4	3.4	3.4	3.4	8.7	8.7	8.7	8.7	1.6	1.6	1.6	1.6	2.6	2.6	2.5	2.6	23.75	22.75	24.25	23.5833	57
DP527-028	24.875	20.125	24	23	43.25	35.5	44.25	41	1.86425	1.68437	1.94175	1.83013	43.104	47.4472	43.8814	44.8109	71	68	69	69.3333	125	131	117	124.333	19.3	20	19.7	19.7	3.4	3.4	3.4	3.4	7.9	8.1	8	8	1.5	1.5	1.5	1.5	2.4	2.4	2.4	2.4	22.5	23.8333	21	22.4444	74
DP527-029	20.125	18	20.25	19.4583	36.5	40.375	49.875	42.25	1.68875	1.97037	2.4035	2.02088	46.2671	48.8019	48.1905	47.7532	67	65	68	66.6667	114	105	111	110	19.9	20.5	20.5	20.3	3.2	3.3	3.3	3.3	8.5	8.7	8.6	8.6	1.7	1.7	1.6	1.6	2.7	2.7	2.6	2.6	22.875	22.75	24	23.2083	85
DP527-030	17.375	15.75	18.625	17.25	26	28	36	30	1.2095	1.38563	1.70938	1.43483	46.5192	49.4866	47.4826	47.8295	62	60	64	62	125	116	130	123.667	19.3	20.4	20.6	20.1	3.3	3.4	3.5	3.4	7.8	8.1	8	8	1.5	1.5	1.5	1.5	2.4	2.4	2.3	2.3	23.5	22	22.625	22.7083	85
DP527-031	18.625	17.25	18.125	18	43.5	36.5	38	39.3333	2.13813	1.74725	1.31262	1.73267	49.1523	47.8699	34.5428	43.855	62	60	62	61.3333	101	105	98	101.333	20.8	20.6	18.5	20	3.5	3.5	3.2	3.4	8.2	8.2	8.1	8.2	1.5	1.5	1.6	1.6	2.4	2.4	2.6	2.4	21	22.5	22	21.8333	62
DP527-032	21.375	19.25	21.875	20.8333	38.625	37.75	42	39.4583	1.839	1.92725	2.00113	1.92246	47.6117	51.053	47.6458	48.7702	64	62	62	62.6667	103	101	113	105.667	20.4	21.2	20.5	20.7	3.3	3.3	3.3	3.3	8.4	8.6	8.4	8.5	1.6	1.6	1.6	1.6	2.6	2.6	2.6	2.6	22.625	20.625	21.5	21.5833	60
DP527-033	20.875	18.625	22.375	20.625	27.25	29.125	42.625	33	1.2425	1.63187	2.42837	1.76758	45.5963	56.03	56.9707	52.8657	73	67	69	69.6667	133	119	131	127.667	23.1	24.2	24.4	23.9	3.7	3.8	3.8	3.7	8.8	9.1	9	8.9	1.6	1.6	1.6	1.6	2.4	2.4	2.4	2.4	21	NA	NA	21	NA
DP527-034	23.125	20.375	21.875	21.7917	33.125	36	32	33.7083	1.88237	2.14075	1.87837	1.96717	56.8264	59.4653	58.6992	58.3303	68	65	68	67	113	117	118	116	24.2	24.6	25.1	24.6	3.5	3.6	3.6	3.6	9.4	9.4	9.6	9.4	1.6	1.6	1.6	1.6	2.7	2.7	2.7	2.7	21.375	21.75	21.125	21.4167	86
DP527-035	19	16.375	18.5	17.9583	39.125	32.625	37.5	36.4167	1.823	1.45738	1.67125	1.65054	46.5942	44.6705	44.5667	45.2771	65	64	65	64.6667	101	92	100	97.6667	20.4	19.9	20.2	20.2	3.2	3.2	3.2	3.2	8.5	8.4	8.4	8.5	1.6	1.6	1.6	1.6	2.7	2.7	2.7	2.7	17.125	17.375	17.75	17.4167	60
DP527-036	19.125	17.625	19.125	18.625	30.875	29.625	29.5	30	1.4855	1.4525	1.32825	1.42208	48.1134	49.0295	45.0254	47.3894	64	60	63	62.3333	104	105	107	105.333	20.9	20.5	20	20.5	3.4	3.4	3.3	3.4	8.6	8.4	8.4	8.5	1.6	1.6	1.6	1.6	2.6	2.5	2.6	2.5	22.75	22.25	23.375	22.7917	66
DP527-037	19.5	18.125	18.875	18.8333	32.75	29.5	30.25	30.8333	1.6995	1.50162	1.52	1.57371	51.8931	50.9025	50.2479	51.0145	63	60	62	61.6667	107	107	104	106	21.4	21.4	21.3	21.4	3.4	3.4	3.4	3.4	8.6	8.6	8.5	8.6	1.6	1.6	1.6	1.6	2.6	2.6	2.5	2.5	19.875	20.875	21.375	20.7083	65
DP527-038	16.75	15.125	17.375	16.4167	28.75	26.25	29.625	28.2083	1.37963	1.29238	1.39088	1.35429	47.987	49.2333	46.9494	48.0566	64	60	62	62	129	126	128	127.667	20.9	21.3	20.9	21	3.5	3.5	3.5	3.5	8.5	8.5	8.4	8.5	1.6	1.6	1.6	1.6	2.4	2.4	2.4	2.4	21.625	22	21.75	21.7917	68
DP527-039	17.25	15.625	16.625	16.5	31	27.875	31.125	30	1.34737	1.39013	1.44063	1.39271	43.4637	49.87	46.2851	46.5396	63	62	62	62.3333	104	95	105	101.333	19.8	21.5	20.7	20.7	3.4	3.5	3.5	3.5	8.3	8.6	8.4	8.5	1.6	1.6	1.6	1.6	2.5	2.5	2.4	2.5	20.25	18.25	19.875	19.4583	67
DP527-040	21.25	19	21	20.4167	34.625	32	33	33.2083	1.88425	1.70637	1.71788	1.7695	54.4188	53.3242	52.0568	53.2666	66	66	65	65.6667	149	155	147	150.333	21.8	22.3	21.4	21.9	3.5	3.6	3.6	3.6	8.7	8.7	8.4	8.6	1.6	1.6	1.5	1.6	2.5	2.4	2.4	2.4	22.25	20.25	22.375	21.625	70
DP527-041	NA	NA	NA	NA	NA	NA	NA	NA	NA	NA	NA	NA	NA	NA	NA	NA	NA	NA	NA	NA	NA	NA	NA	NA	NA	NA	NA	NA	NA	NA	NA	NA	NA	NA	NA	NA	NA	NA	NA	NA	NA	NA	NA	NA	22.125	25.5	25.875	24.5	59
DP527-042	16.875	14.5	16.75	16.0417	33.25	24.5	32.25	30	1.73788	1.33512	1.66312	1.57871	52.2669	54.4949	51.5698	52.7772	61	59	61	60.3333	100	96	99	98.3333	22.6	23.1	22.4	22.7	3.4	3.5	3.4	3.4	9.1	9.2	9	9.1	1.7	1.7	1.6	1.7	2.7	2.7	2.6	2.7	20	20.125	17.875	19.3333	60
DP527-043	20.375	18.25	19.375	19.3333	40.5	39.25	35.875	38.5417	2.0665	2.06562	1.65562	1.92925	51.0247	52.6274	46.1498	49.934	64	62	63	63	120	117	110	115.667	21.5	22.5	21.2	21.8	3.3	3.5	3.3	3.4	9	9.1	9	9	1.7	1.6	1.7	1.7	2.7	2.6	2.7	2.7	21	21.625	22.5	21.7083	60
DP527-044	23.5	20.25	23.625	22.4583	38.75	36.25	40.5	38.5	1.719	1.90837	1.97675	1.86804	44.3613	52.6448	48.8086	48.6049	74	67	66	69	127	121	129	125.667	21.1	23	22.6	22.2	3.2	3.4	3.4	3.3	9	9.4	9.3	9.2	1.7	1.7	1.7	1.7	2.8	2.8	2.8	2.8	22.125	23.875	20	22	85
DP527-045	20.5	18	21.375	19.9583	35.25	29	36.75	33.6667	1.66613	1.37025	1.64288	1.55975	47.266	47.25	44.7041	46.4067	65	64	66	65	98	102	101	100.333	20.2	20.1	19.8	20	3.3	3.3	3.2	3.3	8.3	8.3	8.3	8.3	1.6	1.6	1.6	1.6	2.6	2.5	2.6	2.6	20.625	22.125	20.5	21.0833	64
DP527-046	22.25	18	21.875	20.7083	48.5	33.875	40.375	40.9167	2.8645	1.87125	2.16213	2.29929	59.0619	55.2399	53.5511	55.9509	70	66	70	68.6667	113	115	118	115.333	24.5	23.8	24.5	24.3	3.6	3.5	3.6	3.6	9.3	9.3	9.4	9.3	1.6	1.7	1.6	1.6	2.6	2.7	2.6	2.6	NA	NA	NA	NA	NA
DP527-047	20	16.75	19.125	18.625	34.375	21.125	32.75	29.4167	1.91162	1.224	1.78212	1.63925	55.6109	57.9408	54.416	55.9893	64	61	65	63.3333	105	93	99	99	24.1	24.6	23.9	24.2	3.6	3.6	3.5	3.6	9.2	9.3	9.2	9.2	1.6	1.6	1.6	1.6	2.6	2.6	2.6	2.6	20.375	22	20.625	21	62
DP527-048	17.375	17.5	18	17.625	41.75	41.75	28.875	37.4583	2.07388	2.14262	1.92075	2.04575	49.6737	51.3204	66.5195	55.8378	60	59	62	60.3333	98	102	92	97.3333	21.2	21.9	20.8	21.3	3.5	3.6	3.5	3.5	8.4	8.5	8.3	8.4	1.6	1.5	1.6	1.6	2.4	2.4	2.4	2.4	18.375	18.5	19.625	18.8333	63
DP527-049	17.375	16.375	17.875	17.2083	30	28	31.125	29.7083	1.7525	1.59013	1.66538	1.66933	58.4167	56.7902	53.506	56.2376	59	59	59	59	116	115	117	116	25.3	25.1	24.6	25	3.5	3.5	3.4	3.5	10	9.9	9.8	9.9	1.7	1.7	1.7	1.7	2.9	2.9	2.9	2.9	23.625	24	24.25	23.9583	55
DP527-050	17.875	18.125	17.75	17.9167	36.625	32.75	31.25	33.5417	1.8435	1.54875	1.44687	1.61304	50.3345	47.2901	46.3	47.9748	65	64	64	64.3333	116	116	110	114	20.6	19.9	19.3	19.9	3.5	3.4	3.4	3.4	8	7.9	7.7	7.9	1.5	1.5	1.5	1.5	2.3	2.3	2.3	2.3	21.75	23.125	22.25	22.375	68
DP527-051	20.75	18.25	20.125	19.7083	23	25.5	24.125	24.2083	0.8635	0.97975	1.07925	0.974167	37.5435	38.4216	44.7358	40.2336	61	60	62	61	95	92	91	92.6667	19.6	19.3	21.7	20.2	3	3	3.2	3	9.1	9	9.3	9.1	1.9	1.8	1.8	1.8	3.1	3.1	3	3	22.5	17	18.75	19.4167	62
DP527-052	21.75	20	20.625	20.7917	40.875	44	40.375	41.75	1.8955	2.19275	2.00225	2.03017	46.3731	49.8352	49.5913	48.5999	66	65	61	64	125	121	130	125.333	20	20.7	20.8	20.5	3.3	3.4	3.4	3.4	8.5	8.6	8.6	8.5	1.6	1.6	1.6	1.6	2.6	2.5	2.5	2.5	23.625	25	25	24.5417	70
DP527-053	21.375	19.25	23.125	21.25	35.375	33.625	39	36	1.64775	1.67975	1.93775	1.75508	46.5795	49.9554	49.6859	48.7403	65	65	67	65.6667	127	122	120	123	20.4	21.3	21.5	21.1	3.4	3.4	3.5	3.4	8.8	9	8.9	8.9	1.7	1.7	1.6	1.7	2.6	2.7	2.6	2.6	25.375	25.25	26.25	25.625	NA
DP527-054	21.125	19	21.25	20.4583	37.25	32.875	39.625	36.5833	1.82675	1.68087	1.89875	1.80212	49.0403	51.1293	47.918	49.3625	62	62	64	62.6667	97	99	110	102	21.1	22	20.7	21.2	3.4	3.4	3.3	3.4	8.5	8.7	8.5	8.6	1.6	1.6	1.6	1.6	2.5	2.5	2.5	2.5	20.5	20.375	22.375	21.0833	61
DP527-055	19.25	16.25	17.875	17.7917	30.75	25.125	28.375	28.0833	1.58337	1.41488	1.54575	1.51467	51.4919	56.3134	54.4758	54.0937	59	59	60	59.3333	131	116	121	122.667	21.7	23.1	22.1	22.3	3.4	3.5	3.5	3.5	8.7	9	8.7	8.8	1.6	1.6	1.6	1.6	2.5	2.5	2.5	2.5	20.625	22.625	23.125	22.125	52
DP527-056	19.875	17.625	19.875	19.125	29.25	25.75	26.375	27.125	1.6055	1.401	1.44112	1.48254	54.8889	54.4078	54.6398	54.6455	61	58	60	59.6667	106	107	107	106.667	23.2	22.8	23.3	23.1	3.5	3.4	3.5	3.5	8.9	8.9	8.9	8.9	1.6	1.6	1.6	1.6	2.6	2.6	2.6	2.6	18.625	20.75	21.75	20.375	61
DP527-057	18.625	15.75	18.625	17.6667	33.25	29.875	38.375	33.8333	1.67475	1.591	1.92362	1.72979	50.3684	53.2552	50.127	51.2502	66	63	67	65.3333	110	104	118	110.667	22.4	23.3	23.1	23	3.4	3.6	3.5	3.5	8.8	8.8	9	8.9	1.6	1.6	1.6	1.6	2.6	2.5	2.6	2.6	16.5	18.5	17.75	17.5833	67
DP527-058	19.125	18	19.375	18.8333	30.25	27.25	31	29.5	1.663	1.58225	1.67362	1.63963	54.9752	58.0642	53.9879	55.6758	61	59	62	60.6667	123	112	121	118.667	23.5	23.6	23.1	23.4	3.5	3.5	3.5	3.5	9.5	9.5	9.4	9.5	1.7	1.7	1.7	1.7	2.7	2.7	2.7	2.7	21.25	22.125	23.25	22.2083	63
DP527-059	25.875	17.5	24.5	22.625	50.25	29	49.625	42.9583	2.19588	1.72475	2.11963	2.01342	43.699	59.4741	42.7128	48.6287	68	68	66	67.3333	114	115	111	113.333	20	24.7	19.7	21.4	3.2	3.6	3.1	3.3	8.6	9.6	8.6	9	1.7	1.7	1.7	1.7	2.7	2.7	2.7	2.7	23	25	21.875	23.2917	81
DP527-060	22.5	21.5	23.625	22.5417	37.75	44	44.25	42	1.77988	2.17912	2.36037	2.10646	47.149	49.5256	53.3418	50.0055	69	68	67	68	99	98	103	100	20.5	21.6	21.8	21.3	3.3	3.4	3.5	3.4	8.7	8.8	8.8	8.8	1.6	1.6	1.6	1.6	2.6	2.6	2.5	2.6	21.5	22.875	24.375	22.9167	71
DP527-061	21.125	19.25	20.625	20.3333	30.25	33.25	35.625	33.0417	1.60187	2.09987	2.08775	1.92983	52.9545	63.1541	58.6035	58.2374	66	62	65	64.3333	124	121	133	126	22.9	25.3	24.5	24.2	3.5	3.7	3.6	3.6	8.9	9.4	9.2	9.1	1.6	1.6	1.6	1.6	2.6	2.6	2.5	2.5	19.375	21.5	21.875	20.9167	67
DP527-062	18.375	16.75	17.375	17.5	38.875	35.75	37.875	37.5	1.95713	1.76963	1.95687	1.89454	50.3441	49.5	51.6667	50.5036	66	65	66	65.6667	112	112	113	112.333	21.7	22.1	21.6	21.8	3.6	3.6	3.5	3.6	8.3	8.4	8.3	8.3	1.5	1.5	1.5	1.5	2.3	2.4	2.4	2.4	NA	17.8571	NA	17.8571	NA
DP527-063	20.875	18.5	45.25	28.2083	33.375	29.875	33.5	32.25	2.005	1.71713	1.99238	1.90483	60.0749	57.477	59.4739	59.0086	68	65	68	67	118	116	117	117	26	24.5	26	25.5	3.9	3.8	3.9	3.9	9.4	9.2	9.4	9.4	1.6	1.6	1.6	1.6	2.4	2.5	2.4	2.4	20.75	21.375	20.625	20.9167	84
DP527-064	20	18.5	19	19.1667	40.25	31.75	36.25	36.0833	2.29413	1.81975	2.1295	2.08113	56.9969	57.315	58.7448	57.6856	60	59	59	59.3333	112	109	107	109.333	24.2	24	24	24.1	3.6	3.5	3.5	3.5	9.4	9.3	9.4	9.4	1.6	1.6	1.6	1.6	2.7	2.7	2.7	2.7	22	22.5	21.375	21.9583	50
DP527-065	18.125	17.625	20.25	18.6667	30.875	27.5	32	30.125	1.52788	1.29675	1.60575	1.47679	49.4858	47.1545	50.1797	48.94	67	69	68	68	112	112	118	114	21.5	21.2	21.6	21.4	3.4	3.4	3.5	3.4	8.6	8.6	8.6	8.6	1.6	1.6	1.6	1.6	2.5	2.6	2.5	2.5	20.3333	21.2857	19.75	20.4563	NA
DP527-066	19.125	18	20.875	19.3333	31	29	34.5	31.5	1.78388	1.60125	1.9665	1.78388	57.5444	55.2155	57	56.5866	64	63	67	64.6667	113	111	118	114	24.6	24.1	24.2	24.3	3.5	3.4	3.5	3.5	9.7	9.6	9.5	9.6	1.7	1.7	1.7	1.7	2.8	2.8	2.8	2.8	23.25	21	23.1429	22.4643	91
DP527-067	18.25	16.25	18.25	17.5833	30.625	31.375	34.75	32.25	1.7215	1.65237	1.906	1.75996	56.2122	52.6653	54.8489	54.5755	62	59	63	61.3333	131	126	131	129.333	23.2	22.5	22.8	22.8	3.6	3.6	3.6	3.6	8.9	8.8	8.9	8.9	1.6	1.6	1.6	1.6	2.5	2.5	2.5	2.5	21.125	20.625	21.375	21.0417	56
DP527-068	NA	21.875	23.75	22.8125	NA	33.875	34.5	34.1875	NA	1.83275	1.65538	1.74406	NA	54.1033	47.9819	51.0426	71	70	71	70.6667	133	120	120	124.333	NA	23.3	21.6	22.4	NA	3.6	3.4	3.5	NA	9.1	8.9	9	NA	1.6	1.7	1.6	NA	2.6	2.7	2.6	22.375	21.75	23.25	22.4583	84
DP527-069	19.25	17.625	17.75	18.2083	36.25	33.5	28.625	32.7917	1.77662	1.69338	1.3645	1.6115	49.0103	50.5485	47.6681	49.0757	70	65	65	66.6667	102	98	97	99	21.3	21.1	20.6	21	3.6	3.6	3.6	3.6	8.3	8.2	8.1	8.2	1.5	1.5	1.5	1.5	2.3	2.3	2.3	2.3	20.125	19.875	20.625	20.2083	81
DP527-070	19.75	17.875	19.125	18.9167	33.5	31.5	33.875	32.9583	1.74438	1.68738	1.83875	1.75683	52.0709	53.5675	54.2804	53.3063	66	64	66	65.3333	131	121	126	126	23.6	24	23.1	23.5	3.4	3.5	3.4	3.4	9.2	9.3	9.1	9.2	1.7	1.7	1.6	1.7	2.7	2.7	2.7	2.7	21.375	21.875	21.75	21.6667	74
DP527-071	20.25	16.375	20.625	19.0833	42	38.875	43.375	41.4167	1.98425	1.92112	1.9775	1.96096	47.244	49.418	45.5908	47.4176	66	65	65	65.3333	109	105	109	107.667	21.7	22.4	21.4	21.8	3.3	3.4	3.3	3.3	9.1	9.1	8.9	9	1.7	1.7	1.7	1.7	2.7	2.7	2.7	2.7	22.5	21.75	24.4	22.8833	NA
DP527-072	20.625	18.25	19.125	19.3333	36.25	32.375	31.25	33.2917	1.63813	1.6775	1.62813	1.64792	45.1897	51.8147	52.1	49.7014	68	67	68	67.6667	100	95	96	97	19.7	21.2	21.5	20.8	3.5	3.6	3.6	3.6	7.9	8.2	8.2	8.1	1.5	1.5	1.5	1.5	2.3	2.3	2.3	2.3	22	NA	NA	22	NA
DP527-073	22.875	19.875	22.625	21.7917	36.375	34.875	32.5	34.5833	1.90675	1.94388	1.725	1.85854	52.4192	55.7384	53.0769	53.7448	67	64	67	66	130	121	118	123	23.3	23.8	22.9	23.4	3.5	3.5	3.4	3.5	9.4	9.6	9.4	9.5	1.7	1.7	1.7	1.7	2.7	2.7	2.8	2.7	21	21.375	22.125	21.5	68
DP527-074	21.625	19.625	20.5	20.5833	35.5	29.875	31	32.125	1.86563	1.58662	1.68025	1.71083	52.5528	53.1088	54.2016	53.2877	64	62	62	62.6667	121	115	113	116.333	22.8	22.6	22.8	22.7	3.5	3.4	3.5	3.5	9.4	9.4	9.4	9.4	1.7	1.7	1.7	1.7	2.7	2.7	2.7	2.7	20.25	21.625	22.5	21.4583	81
DP527-075	16.625	14.875	16.625	16.0417	29.375	26.375	27.625	27.7917	1.38688	1.36475	1.347	1.36621	47.2128	51.7441	48.7602	49.239	66	63	64	64.3333	102	96	99	99	21.3	22.7	21.4	21.8	3.5	3.6	3.4	3.5	8.3	8.4	8.4	8.4	1.5	1.5	1.6	1.5	2.4	2.3	2.5	2.4	17.875	18.375	19.25	18.5	63
DP527-076	18.375	16.375	21.375	18.7083	42.125	36.875	36.625	38.5417	2.11488	1.82075	1.53937	1.825	50.2047	49.3763	42.0307	47.2039	65	68	67	66.6667	136	128	122	128.667	22	21.8	20.1	21.3	3.5	3.5	3.3	3.4	8.5	8.6	8.4	8.5	1.5	1.6	1.6	1.6	2.4	2.5	2.6	2.5	19.75	19.875	20.125	19.9167	85
DP527-077	21.125	19.25	22.875	21.0833	42	36.25	31.5	36.5833	2.03313	1.81775	2.00888	1.95325	48.4077	50.1448	63.7738	54.1088	67	65	69	67	124	105	113	114	21.3	22	21.2	21.5	3.3	3.4	3.3	3.3	8.7	8.9	8.8	8.8	1.6	1.6	1.7	1.6	2.6	2.6	2.7	2.7	22.375	20.5	22.5	21.7917	81
DP527-078	17.25	16.125	16.125	16.5	47.125	47.75	40.375	45.0833	2.07687	2.11975	1.79913	1.99858	44.0716	44.3927	44.5604	44.3416	69	67	65	67	109	101	103	104.333	20.6	20.2	20.6	20.5	3.3	3.2	3.3	3.3	8.7	8.5	8.7	8.7	1.7	1.7	1.7	1.7	2.7	2.7	2.7	2.7	19.75	19.125	21.25	20.0417	73
DP527-079	18	17.25	17.75	17.6667	30.375	26.375	28	28.25	1.49525	1.36575	1.336	1.399	49.2263	51.782	47.7143	49.5742	65	60	62	62.3333	108	99	98	101.667	21.3	21.8	21.3	21.5	3.4	3.4	3.4	3.4	8.7	8.8	8.8	8.8	1.6	1.6	1.6	1.6	2.6	2.6	2.6	2.6	25	26.25	24.625	25.2917	78
DP527-080	18.25	17.375	18	17.875	31.25	30.125	32	31.125	1.50175	1.48037	1.587	1.52304	48.056	49.1411	49.5938	48.9303	61	60	60	60.3333	126	112	114	117.333	19.6	19.8	20.2	19.8	3.4	3.4	3.5	3.4	7.9	8	8	8	1.5	1.5	1.5	1.5	2.3	2.4	2.3	2.3	23.5	23.625	23.375	23.5	57
DP527-081	18.5	17.25	19	18.25	38.125	32.75	37	35.9583	2.10012	1.93988	2.11037	2.05012	55.0852	59.2328	57.0372	57.1184	66	65	67	66	126	111	118	118.333	23.1	24.3	24	23.8	3.4	3.5	3.4	3.4	9.6	10	9.9	9.8	1.7	1.8	1.8	1.8	2.8	2.9	2.9	2.9	17.875	20	21.625	19.8333	84
DP527-082	20.875	18.625	19.75	19.75	37.125	34.5	34	35.2083	1.869	1.75012	1.72675	1.78196	50.3434	50.7283	50.7868	50.6195	60	61	62	61	117	106	112	111.667	21.9	21.9	21.7	21.8	3.5	3.5	3.5	3.5	8.6	8.7	8.5	8.6	1.6	1.6	1.6	1.6	2.5	2.5	2.5	2.5	20.75	19.75	22.25	20.9167	57
DP527-083	23.625	21.5	23.5	22.875	45.5	42.625	44.875	44.3333	2.03613	1.871	1.98175	1.96296	44.75	43.8944	44.1616	44.2687	64	60	63	62.3333	108	90	99	99	20.2	19.6	20	19.9	3.3	3.2	3.3	3.3	8.4	8.4	8.3	8.4	1.6	1.6	1.6	1.6	2.5	2.6	2.5	2.6	19.875	19.875	21.875	20.5417	63
DP527-084	19.625	19.125	19.75	19.5	33.75	32.25	32.5	32.8333	1.66175	1.73638	1.7085	1.70221	49.237	53.8411	52.5692	51.8825	64	65	63	64	128	115	117	120	21.1	22	21.8	21.6	3.4	3.5	3.5	3.5	8.6	8.8	8.7	8.7	1.6	1.6	1.6	1.6	2.5	2.6	2.5	2.5	23.125	22.375	23	22.8333	63
DP527-085	18.5	17.375	18.25	18.0417	30.875	27.875	23.25	27.3333	1.64538	1.6375	1.067	1.44996	53.2915	58.7444	45.8925	52.6428	65	62	63	63.3333	131	127	127	128.333	23.6	24.4	21.7	23.2	3.6	3.6	3.4	3.6	9.1	9.3	8.9	9.1	1.6	1.6	1.7	1.6	2.5	2.6	2.6	2.6	18.375	18.125	19.625	18.7083	60
DP527-086	20	18	20.625	19.5417	28	24.125	25	25.7083	1.11475	1.11625	1.0565	1.09583	39.8125	46.2694	42.26	42.7806	67	67	70	68	100	101	109	103.333	20.1	21.4	20.2	20.6	3.3	3.4	3.3	3.3	8.7	8.9	8.7	8.8	1.7	1.7	1.7	1.7	2.7	2.6	2.7	2.7	19.125	19.375	20.75	19.75	71
DP527-087	25	26.375	26.125	25.8333	42.3333	42.125	37.75	40.7361	1.879	2.33913	1.95075	2.05629	44.3858	55.5282	51.6755	50.5298	70	72	69	70.3333	133	128	127	129.333	22.9	24.1	22.3	23.1	3.6	3.7	3.5	3.6	8.9	9	8.8	8.9	1.6	1.6	1.6	1.6	2.5	2.4	2.5	2.5	18.75	25.875	23.25	22.625	84
DP527-088	21.125	17.625	20.375	19.7083	31.5	29.75	35	32.0833	1.349	1.60163	1.779	1.57654	42.8254	53.8361	50.8286	49.1634	67	65	65	65.6667	116	117	124	119	21.3	23.3	22.1	22.2	3.2	3.5	3.4	3.4	9.2	9.3	9.1	9.2	1.7	1.7	1.7	1.7	2.9	2.7	2.7	2.8	21.25	21.75	22.5	21.8333	70
DP527-089	21.75	19.375	23.25	21.4583	35.25	32.875	38.125	35.4167	1.96113	1.78675	2.04363	1.9305	55.6348	54.3498	53.6033	54.5293	65	62	66	64.3333	131	118	124	124.333	23.6	23.7	23.5	23.6	3.5	3.5	3.5	3.5	9.4	9.5	9.3	9.4	1.7	1.7	1.6	1.7	2.7	2.8	2.7	2.7	25	23	24.625	24.2083	90
DP527-090	17.375	17.25	18.375	17.6667	29.625	27.5	28.25	28.4583	1.50038	1.42013	1.35438	1.42496	50.6456	51.6409	47.9425	50.0763	62	59	60	60.3333	117	108	114	113	21.7	21.6	20.3	21.2	3.4	3.4	3.3	3.4	8.7	8.7	8.4	8.6	1.6	1.6	1.6	1.6	2.5	2.6	2.6	2.5	21.25	19.5	21	20.5833	59
DP527-091	20.5	17.625	19.125	19.0833	44.625	30	40.25	38.2917	2.05525	1.461	2.15088	1.88904	46.056	48.7	53.4379	49.398	62	60	62	61.3333	105	101	104	103.333	20.3	21.5	22.2	21.3	3.3	3.4	3.5	3.4	8.7	9	8.8	8.8	1.6	1.7	1.6	1.6	2.6	2.7	2.5	2.6	20.375	24	21.75	22.0417	64
DP527-092	22.375	19.25	21.875	21.1667	31.5	32.375	35.5	33.125	1.39387	1.73237	1.8935	1.67325	44.25	53.5097	53.338	50.3659	72	64	68	68	134	126	136	132	21.2	22.4	22.7	22.1	3.4	3.5	3.5	3.5	9	9	9.1	9.1	1.7	1.6	1.6	1.7	2.7	2.6	2.6	2.6	20.875	23	21.375	21.75	67
DP527-093	23	20.125	21.875	21.6667	48.5	39.375	35.625	41.1667	2.39538	2.01463	1.862	2.09067	49.3892	51.1651	52.2667	50.9403	67	64	64	65	114	117	110	113.667	21.2	21.8	22.1	21.7	3.5	3.6	3.6	3.6	8.3	8.4	8.5	8.4	1.5	1.5	1.5	1.5	2.4	2.3	2.4	2.4	22.5	26.75	26.375	25.2083	63
DP527-094	22.5	17.875	20	20.125	46	34	43.375	41.125	1.9435	1.61763	1.98762	1.84958	42.25	47.5772	45.8242	45.2171	66	62	64	64	107	105	114	108.667	20	20.7	20.3	20.3	3.2	3.2	3.2	3.2	8.6	8.8	8.6	8.7	1.7	1.7	1.7	1.7	2.7	2.7	2.7	2.7	22.125	21.375	23	22.1667	81
DP527-095	17.5	16.875	17.875	17.4167	28.375	24.5	24.875	25.9167	1.59813	1.29763	1.35062	1.41546	56.3216	52.9643	54.2965	54.5275	62	59	60	60.3333	118	111	113	114	23.4	22.8	22.4	22.8	3.5	3.4	3.4	3.4	9.4	9.3	9.1	9.3	1.7	1.7	1.7	1.7	2.7	2.7	2.7	2.7	20.125	20.5	21.25	20.625	60
DP527-096	24.75	23.875	23	23.875	34.375	44.875	44.5	41.25	1.29275	2.08875	2.12712	1.83621	37.6073	46.546	47.8006	43.9846	80	77	79	78.6667	115	113	114	114	18.8	21.2	21.8	20.6	3.2	3.5	3.6	3.4	8.3	8.7	8.7	8.6	1.7	1.6	1.6	1.6	2.6	2.5	2.5	2.5	21	20	24.125	21.7083	NA
DP527-097	24.5	19.75	24.375	22.875	36.25	37.5	38.125	37.2917	1.779	1.891	1.92375	1.86458	49.0759	50.4267	50.459	49.9872	72	59	70	67	125	123	116	121.333	22.2	22.4	22.1	22.2	3.5	3.5	3.6	3.5	8.7	8.8	8.6	8.7	1.6	1.6	1.6	1.6	2.5	2.5	2.4	2.5	24	20	NA	22	NA
DP527-098	27.625	25	24.875	25.8333	40	37	38.25	38.4167	2.297	1.75412	2.04413	2.03175	57.425	47.4088	53.4412	52.7583	70	66	68	68	123	115	109	115.667	23.1	19.6	21.8	21.5	3.5	3.2	3.4	3.4	8.9	8.3	8.6	8.6	1.6	1.6	1.6	1.6	2.6	2.6	2.6	2.6	24.75	24.5	25.25	24.8333	68
DP527-099	17.25	15.75	16.875	16.625	30.625	27.625	43.25	33.8333	1.31537	1.30462	1.4285	1.3495	42.951	47.2262	33.0289	41.0687	61	59	60	60	102	102	99	101	19.2	19.9	20.2	19.7	3.3	3.4	3.4	3.3	8	7.9	8.1	8	1.6	1.5	1.5	1.5	2.5	2.3	2.4	2.4	15.25	20.125	17.875	17.75	70
DP527-100	21.5	19.375	21.75	20.875	37.5	37.875	38.25	37.875	1.8895	1.8385	1.81125	1.84642	50.3867	48.5413	47.3529	48.7603	63	60	62	61.6667	112	104	109	108.333	21.8	22.6	21.7	22	3.4	3.5	3.4	3.4	8.7	8.8	8.7	8.7	1.6	1.6	1.6	1.6	2.6	2.5	2.6	2.6	19.75	22.5	21.375	21.2083	56
DP527-101	18.25	16.625	17.375	17.4167	36.375	28.375	29.125	31.2917	1.698	1.5025	1.521	1.57383	46.6804	52.9515	52.2232	50.6184	62	57	58	59	113	103	110	108.667	20.7	21.8	22.1	21.5	3.4	3.5	3.5	3.5	8.5	8.7	8.7	8.6	1.6	1.6	1.6	1.6	2.5	2.5	2.5	2.5	21.875	22.625	22.25	22.25	54
DP527-102	19.875	20.375	20.25	20.1667	35.875	30.875	36	34.25	1.77038	1.643	1.77212	1.7285	49.3484	53.2146	49.2257	50.5962	62	58	60	60	107	107	101	105	21	21.5	21	21.2	3.3	3.4	3.3	3.4	8.7	8.7	8.8	8.8	1.6	1.6	1.7	1.6	2.6	2.5	2.7	2.6	19.625	19.625	23.625	20.9583	NA
DP527-103	20.375	16.5	18	18.2917	29.875	29.5	30.125	29.8333	1.55675	1.55225	1.54875	1.55258	52.1088	52.6186	51.4108	52.0461	60	59	59	59.3333	111	101	107	106.333	22.1	22.6	21.4	22	3.5	3.5	3.5	3.5	8.7	8.8	8.5	8.6	1.6	1.6	1.6	1.6	2.5	2.5	2.5	2.5	19.625	23.625	22.375	21.875	69
DP527-104	20.125	15.875	20	18.6667	42.375	30.875	47.375	40.2083	2.58675	1.94925	2.91075	2.48225	61.0442	63.1336	61.4406	61.8728	67	63	64	64.6667	133	118	129	126.667	25	25.6	25.1	25.2	3.7	3.8	3.8	3.8	9.3	9.5	9.3	9.4	1.6	1.6	1.6	1.6	2.5	2.5	2.5	2.5	21	22.75	23.5	22.4167	65
DP527-105	18.375	17.125	18.625	18.0417	28.25	27.5	27.25	27.6667	1.36575	1.34088	1.36163	1.35608	48.3451	48.7591	49.9679	49.024	60	60	61	60.3333	108	105	99	104	21	21.4	20.9	21.1	3.4	3.4	3.4	3.4	8.6	8.7	8.5	8.6	1.6	1.6	1.6	1.6	2.6	2.6	2.5	2.6	19.5	19.125	20.25	19.625	53
DP527-106	18.75	15.625	18.625	17.6667	34.625	27.375	31.5	31.1667	1.58175	1.4135	1.482	1.49242	45.6823	51.6347	47.0476	48.1215	67	63	66	65.3333	98	95	99	97.3333	20.5	21.7	20.4	20.9	3.3	3.4	3.3	3.4	8.5	8.7	8.4	8.5	1.6	1.6	1.6	1.6	2.5	2.5	2.5	2.5	21.375	19.125	19.875	20.125	64
DP527-107	20.25	18.25	20.75	19.75	35.75	31.5	38.375	35.2083	1.794	1.60425	1.887	1.76175	50.1818	50.9286	49.1726	50.0943	65	63	66	64.6667	114	107	117	112.667	20.5	21.1	20.5	20.7	3.5	3.5	3.5	3.5	8.3	8.3	8.2	8.2	1.5	1.5	1.5	1.5	2.4	2.4	2.4	2.4	21.625	23.125	23.125	22.625
DP527-108	18.75	16.5	18.5	17.9167	40.5	27.5	38.5	35.5	1.84312	1.27988	1.7675	1.63017	45.5093	46.5409	45.9091	45.9864	63	59	60	60.6667	99	97	103	99.6667	19.2	19.5	19.9	19.5	3.3	3.3	3.4	3.4	7.9	8	7.9	7.9	1.5	1.5	1.5	1.5	2.4	2.4	2.3	2.4	23.25	25	25	24.4167	60
DP527-109	20.2857	17.625	19.5	19.1369	39.4286	31.5	41.25	37.3929	1.31957	1.46938	1.95138	1.58011	33.4674	46.6468	47.3061	42.4734	70	60	63	64.3333	97	100	99	98.6667	17.4	19.7	20	19	3.2	3.5	3.5	3.4	7.5	7.8	7.8	7.7	1.6	1.5	1.5	1.5	2.4	2.3	2.3	2.3	22.75	19.875	21.375	21.3333	62
DP527-110	20.5	19	20	19.8333	32.25	29.75	32.25	31.4167	1.65675	1.54325	1.67037	1.62346	51.3721	51.8739	51.7946	51.6802	60	57	59	58.6667	103	104	113	106.667	23.4	22.6	23	23	3.3	3.3	3.3	3.3	9.5	9.2	9.3	9.4	1.7	1.7	1.7	1.7	2.9	2.8	2.8	2.9	22.75	22.5	23.375	22.875	55
DP527-111	23.2857	20.5	20.75	21.5119	38.2857	36.25	39.875	38.1369	1.95886	1.80488	1.91925	1.89433	51.1642	49.7897	48.1317	49.6952	70	62	63	65	105	105	108	106	22	20.9	20.9	21.2	3.5	3.3	3.4	3.4	8.6	8.5	8.5	8.5	1.6	1.6	1.6	1.6	2.4	2.6	2.5	2.5	17.25	17.875	18	17.7083	78
DP527-112	21.375	19	20	20.125	46.75	38.625	51.375	45.5833	2.36813	1.91625	2.77275	2.35237	50.6551	49.6117	53.9708	51.4125	68	66	68	67.3333	121	118	118	119	22.2	21.8	22.9	22.3	3.4	3.4	3.5	3.4	9	8.8	9	8.9	1.6	1.6	1.6	1.6	2.7	2.6	2.6	2.6	21.75	22.25	24.5	22.8333	91
DP527-113	25.5	19.875	21	22.125	41.5	33.625	33.625	36.25	1.55987	1.80262	1.7325	1.69833	37.5873	53.6097	51.5242	47.5737	77	59	62	66	137	132	132	133.667	18.4	21.9	21.1	20.5	3.1	3.4	3.4	3.3	8.4	9	8.6	8.6	1.7	1.6	1.6	1.7	2.8	2.7	2.5	2.6	22.875	24	25.125	24	70
DP527-114	19.5	19.625	20.75	19.9583	34.5	25.875	28.625	29.6667	1.76687	1.3865	1.28687	1.48008	51.2138	53.5845	44.9563	49.9182	62	61	62	61.6667	101	100	101	100.667	22.3	22.4	21.2	22	3.5	3.5	3.4	3.5	9	9	8.9	9	1.6	1.6	1.7	1.6	2.6	2.6	2.7	2.6	21.5	22.625	22.125	22.0833	57
DP527-115	20.625	19.375	19.75	19.9167	32.125	17	27.375	25.5	1.68	1.74675	1.53388	1.65354	52.2957	102.75	56.032	70.3592	66	62	63	63.6667	120	119	116	118.333	23.5	24.5	24	24	3.7	3.8	3.7	3.7	8.9	9	8.9	8.9	1.6	1.5	1.6	1.6	2.4	2.4	2.4	2.4	19.375	20.5	22.25	20.7083	64
DP527-116	19.25	18.125	19	18.7917	36.25	34	37.25	35.8333	1.77275	1.78937	1.98975	1.85062	48.9034	52.6287	53.4161	51.6494	65	60	60	61.6667	111	116	115	114	21.6	21.9	21.5	21.7	3.6	3.6	3.6	3.6	8.2	8.2	8.2	8.2	1.5	1.5	1.5	1.5	2.3	2.3	2.3	2.3	19.5	20.5	23.375	21.125	59
DP527-117	19.25	18.125	19	18.7917	31.75	31	31.125	31.2917	1.66362	1.56	1.53275	1.58546	52.3976	50.3226	49.245	50.6551	59	59	60	59.3333	116	107	116	113	21.4	20.6	19.9	20.7	3.6	3.5	3.4	3.5	8.4	8.3	8.1	8.3	1.5	1.5	1.5	1.5	2.4	2.4	2.4	2.4	22.5	22.625	22.875	22.6667	59
DP527-118	18	16.875	18.375	17.75	29.375	28.375	32.625	30.125	1.57337	1.60075	1.7585	1.64421	53.5617	56.4141	53.9004	54.6254	59	59	59	59	114	113	111	112.667	22.6	23.4	22.2	22.7	3.5	3.5	3.4	3.5	8.8	8.9	8.7	8.8	1.6	1.6	1.6	1.6	2.5	2.5	2.5	2.5	21.625	21	22.25	21.625	56
DP527-119	16.375	16.25	16.625	16.4167	25.5	24.625	23.625	24.5833	1.255	1.27975	1.093	1.20925	49.2157	51.9695	46.2646	49.1499	61	59	60	60	122	116	116	118	21.9	22.1	21	21.7	3.5	3.5	3.4	3.4	8.8	8.9	8.7	8.8	1.6	1.6	1.6	1.6	2.6	2.6	2.6	2.6	18	19.25	20	19.0833	61
DP527-120	19.5	18.5	20.125	19.375	31.125	28.125	32.875	30.7083	1.36475	1.4375	1.61963	1.47396	43.8474	51.1111	49.2662	48.0749	63	62	62	62.3333	131	121	138	130	20.5	21.9	21.5	21.3	3.3	3.5	3.5	3.4	8.5	8.7	8.6	8.6	1.6	1.6	1.6	1.6	2.6	2.5	2.5	2.5	21.625	18.875	19.375	19.9583	62
DP527-121	21	18.875	20.125	20	39.125	32.875	40.375	37.4583	2.1485	1.99063	1.95687	2.032	54.9137	60.5513	48.4675	54.6442	62	59	62	61	113	105	105	107.667	23.8	24.5	22.2	23.5	3.6	3.5	3.4	3.5	9.3	9.6	9.1	9.4	1.7	1.7	1.7	1.7	2.6	2.7	2.7	2.7	22	21.375	22	21.7917	56
DP527-122	20.5	18	20.875	19.7917	47.25	36.875	45.75	43.2917	2.26825	1.9115	2.30713	2.16229	48.0053	51.8373	50.429	50.0905	62	59	63	61.3333	100	100	108	102.667	20.3	21.1	21	20.8	3.4	3.4	3.5	3.5	8.2	8.4	8.2	8.3	1.6	1.6	1.5	1.5	2.4	2.4	2.4	2.4	23.25	22.625	23.75	23.2083	57
DP527-123	19.375	18.5	20.875	19.5833	31.625	31.25	40.5	34.4583	1.58	1.73225	2.18438	1.83221	49.9605	55.432	53.9352	53.1092	60	59	62	60.3333	105	103	101	103	22.1	23.7	23.3	23	3.3	3.4	3.4	3.4	9.3	9.6	9.4	9.4	1.7	1.7	1.7	1.7	2.8	2.8	2.8	2.8	19.875	21.125	22.25	21.0833	67
DP527-124	19.75	19.375	19.5	19.5417	32	30.625	30.375	31	1.97887	1.96113	1.85813	1.93271	61.8398	64.0367	61.1728	62.3498	62	61	59	60.6667	135	122	126	127.667	25.4	25.9	24.9	25.4	3.6	3.7	3.6	3.6	9.9	9.9	9.8	9.9	1.7	1.7	1.7	1.7	2.8	2.7	2.8	2.8	21	19.625	20.625	20.4167	57
DP527-125	21.625	19.5	21.875	21	36.875	34.125	38.25	36.4167	1.762	1.87975	2.07613	1.90596	47.7831	55.0842	54.2778	52.3817	64	59	63	62	122	124	138	128	21.6	23.3	23.4	22.7	3.4	3.5	3.6	3.5	9	9.2	9.1	9.1	1.7	1.6	1.6	1.7	2.7	2.6	2.6	2.6	19.5	21.875	22.875	21.4167	63
DP527-126	17.375	16.625	18	17.3333	29.5	21.75	26	25.75	1.556	1.05775	1.18025	1.26467	52.7458	48.6322	45.3942	48.9241	61	60	62	61	97	95	96	96	22.5	21.9	21.8	22.1	3.7	3.6	3.5	3.6	8.6	8.3	8.6	8.5	1.5	1.5	1.6	1.6	2.4	2.3	2.5	2.4	17.125	16.625	18.25	17.3333	57
DP527-127	19.875	19.125	21.375	20.125	31.875	31.875	37.125	33.625	1.55625	1.52725	1.94887	1.67746	48.8235	47.9137	52.4949	49.7441	64	64	64	64	103	105	111	106.333	20.8	21.6	22.5	21.6	3.4	3.5	3.5	3.5	8.5	8.6	8.8	8.6	1.6	1.6	1.6	1.6	2.5	2.5	2.5	2.5	20.25	21.625	20.125	20.6667	63
DP527-128	23.25	20.625	21.75	21.875	39.25	36.25	35.375	36.9583	1.9935	1.843	1.66738	1.83462	50.7898	50.8414	47.1343	49.5885	66	63	62	63.6667	105	102	98	101.667	22.4	21.8	20.8	21.7	3.4	3.3	3.2	3.3	9.2	9.2	8.9	9.1	1.7	1.7	1.7	1.7	2.7	2.8	2.8	2.8	17.875	18.125	20.375	18.7917	65
DP527-129	17.875	17.25	19.25	18.125	32.25	28.625	33.25	31.375	1.65775	1.396	1.74638	1.60004	51.4031	48.7686	52.5226	50.8981	64	60	62	62	96	93	99	96	21.6	20.5	21.6	21.2	3.6	3.5	3.6	3.6	8.2	8.1	8.1	8.1	1.5	1.5	1.5	1.5	2.3	2.3	2.3	2.3	21.5	20.75	21.625	21.2917	59
DP527-130	15.5	15	16.25	15.5833	24.875	21.625	24.125	23.5417	1.18837	1.00988	1.22012	1.13946	47.7739	46.6994	50.5751	48.3495	62	59	60	60.3333	109	116	114	113	22.9	22.2	22.5	22.5	3.4	3.4	3.4	3.4	9.3	9	9	9.1	1.7	1.7	1.7	1.7	2.7	2.7	2.7	2.7	19.25	19.875	20.875	20	60
DP527-131	18.375	18.125	17.125	17.875	30.375	28.75	28	29.0417	1.7245	1.67663	1.60638	1.66917	56.7737	58.3174	57.3705	57.4872	59	57	59	58.3333	106	110	103	106.333	24.8	24.7	25.4	25	3.7	3.6	3.7	3.7	9.4	9.6	9.6	9.5	1.7	1.7	1.7	1.7	2.5	2.7	2.6	2.6	18.5	20	21.5	20	61
DP527-132	17.75	17.125	17.75	17.5417	34	28.25	31.25	31.1667	1.89863	1.65162	1.82163	1.79062	55.8419	58.4646	58.292	57.5328	60	57	60	59	118	109	119	115.333	23.8	24.2	24.4	24.1	3.6	3.7	3.7	3.7	9.1	9.3	9.3	9.2	1.6	1.6	1.6	1.6	2.5	2.5	2.5	2.5	20.625	23.75	24.875	23.0833	71
DP527-133	16.75	16.5	17	16.75	25.875	25.25	26.375	25.8333	1.36625	1.33925	1.464	1.38983	52.8019	53.0396	55.5071	53.7829	58	59	59	58.6667	118	110	115	114.333	22	22.2	22.5	22.2	3.5	3.5	3.6	3.5	8.8	8.9	8.9	8.9	1.6	1.6	1.6	1.6	2.5	2.5	2.5	2.5	18.75	19	21	19.5833	64
DP527-134	17.375	17.125	18.25	17.5833	36.375	35.25	35.625	35.75	1.6565	1.63688	1.60537	1.63292	45.5395	46.4362	45.0632	45.6796	61	63	60	61.3333	100	95	100	98.3333	20.9	21.5	20.6	21	3.4	3.5	3.4	3.5	8.4	8.4	8.4	8.4	1.6	1.6	1.6	1.6	2.5	2.4	2.5	2.4	17.75	19.625	19	18.7917	77
DP527-135	18.75	18.25	18.125	18.375	26.875	27.875	27	27.25	1.53763	1.645	1.5935	1.59204	57.214	59.0135	59.0185	58.4153	62	59	59	60	114	113	114	113.667	24.1	24.5	24.7	24.4	3.5	3.5	3.5	3.5	9.6	9.8	9.9	9.8	1.7	1.7	1.7	1.7	2.8	2.8	2.8	2.8	22	22	22.625	22.2083	55
DP527-136	19.5	17.25	18.625	18.4583	31.25	25.75	29.375	28.7917	1.51612	1.33163	1.53	1.45925	48.516	51.7136	52.0851	50.7716	59	59	59	59	94	100	102	98.6667	21.3	21.5	21.8	21.5	3.4	3.4	3.5	3.4	8.5	8.6	8.6	8.6	1.6	1.6	1.6	1.6	2.5	2.5	2.5	2.5	18.75	19.125	20.5	19.4583	84
DP527-137	17.125	16.25	17.5	16.9583	33.5	34.375	38.125	35.3333	1.47212	1.5755	1.826	1.62454	43.944	45.8327	47.8951	45.8906	57	55	59	57	103	96	104	101	20.2	20.5	20.6	20.4	3.3	3.3	3.3	3.3	8.6	8.7	8.5	8.6	1.7	1.6	1.6	1.6	2.6	2.7	2.6	2.6	23	22	22.125	22.375	52
DP527-138	22	21.75	22	21.9167	31.75	32.5	32.375	32.2083	1.547	1.6125	1.60963	1.58971	48.7244	49.6154	49.7181	49.3526	59	57	58	58	113	108	110	110.333	21.1	21.3	22.1	21.5	3.3	3.3	3.4	3.3	8.9	9	9.1	9	1.7	1.7	1.7	1.7	2.7	2.7	2.7	2.7	23	21.75	24.125	22.9583	52
DP527-139	19.75	18.375	21.5	19.875	38.625	34.125	36.875	36.5417	1.9765	1.80425	1.47162	1.75079	51.1715	52.8718	39.9085	47.9839	64	63	67	64.6667	115	111	124	116.667	21.1	22	19.2	20.8	3.5	3.5	3.2	3.4	8.4	8.6	8.5	8.5	1.5	1.6	1.7	1.6	2.4	2.4	2.7	2.5	21.75	21.5	21.875	21.7083	65
DP527-140	19.625	17.625	19.375	18.875	33.75	30.75	29.875	31.4583	1.68863	1.641	1.424	1.58454	50.0333	53.3659	47.6653	50.3548	63	63	64	63.3333	119	122	126	122.333	21.9	23.2	22.1	22.4	3.6	3.6	3.6	3.6	8.9	9.2	8.9	9	1.6	1.6	1.6	1.6	2.5	2.5	2.5	2.5	21.625	19.25	19.75	20.2083	65
DP527-141	18.5	18	19	18.5	30.5	29.5	35.625	31.875	1.79688	1.63987	2.086	1.84092	58.9139	55.589	58.5544	57.6858	59	59	59	59	118	111	119	116	23.9	23.2	23.7	23.6	3.5	3.4	3.6	3.5	9.6	9.6	9.4	9.5	1.7	1.7	1.6	1.7	2.7	2.8	2.6	2.7	23.125	24.5	22.5	23.375	59
DP527-142	17.25	17	17.375	17.2083	31.375	29.875	31.875	31.0417	1.49087	1.49225	1.53875	1.50729	47.5179	49.9498	48.2745	48.5807	59	56	58	57.6667	105	102	100	102.333	20.5	20.8	20.2	20.5	3.4	3.4	3.4	3.4	8.2	8.3	8.2	8.2	1.5	1.5	1.5	1.5	2.4	2.4	2.4	2.4	20.625	19.875	20.875	20.4583	53
DP527-143	19	16.875	20	18.625	29.625	26.375	34.5	30.1667	1.5345	1.40325	1.81975	1.58583	51.7975	53.2038	52.7464	52.5825	60	59	62	60.3333	96	93	97	95.3333	22.9	22.4	23.5	22.9	3.6	3.5	3.6	3.6	8.9	8.9	9	8.9	1.6	1.6	1.6	1.6	2.5	2.5	2.5	2.5	20.625	20.875	22.1429	21.2143	61
DP527-144	18.375	17.625	19.125	18.375	31.5	35.25	42.125	36.2917	1.969	2.10575	2.42625	2.167	62.5079	59.7376	57.5964	59.9473	62	60	63	61.6667	121	116	117	118	24	24.8	24.3	24.4	3.5	3.6	3.6	3.5	9.5	9.6	9.5	9.5	1.7	1.6	1.7	1.7	2.7	2.7	2.7	2.7	19.625	18.625	20.5	19.5833	63
DP527-145	19.5	18.25	18.75	18.8333	33.125	27.625	30	30.25	1.58888	1.17687	1.45175	1.40583	47.966	42.6018	48.3917	46.3198	62	60	60	60.6667	97	88	89	91.3333	21	20.6	21.2	21	3.5	3.4	3.4	3.4	8.3	8.4	8.4	8.4	1.5	1.6	1.6	1.6	2.4	2.5	2.5	2.5	18.25	19.625	20.625	19.5	61
DP527-146	18.625	18.875	19.375	18.9583	39.875	38.375	44.25	40.8333	1.79737	1.69475	2.0725	1.85488	45.0752	44.1629	46.8362	45.3581	60	57	59	58.6667	110	94	95	99.6667	20	19.6	20.5	20	3.3	3.2	3.3	3.3	8.3	8.2	8.3	8.3	1.6	1.6	1.6	1.6	2.5	2.6	2.5	2.5	20	21.375	21.25	20.875	62
DP527-147	18.375	17	18.75	18.0417	33.375	28.25	31.375	31	1.94975	1.61825	1.75575	1.77458	58.4195	57.2832	55.9602	57.2209	57	55	59	57	112	105	112	109.667	24.7	25	24.4	24.7	3.5	3.6	3.6	3.6	9.6	9.6	9.4	9.5	1.7	1.7	1.6	1.7	2.7	2.7	2.6	2.7	19.5	20.25	22	20.5833	49
DP527-148	18.875	18.875	20	19.25	29.375	32	37.875	33.0833	1.28	1.54337	1.86813	1.56383	43.5745	48.2305	49.3234	47.0428	60	62	64	62	113	114	116	114.333	20.2	20.6	21.4	20.7	3.2	3.2	3.3	3.3	8.7	8.8	8.8	8.8	1.7	1.7	1.6	1.7	2.8	2.7	2.7	2.7	20.625	22.5	21.875	21.6667	52
DP527-149	19.875	17.75	18.375	18.6667	31.125	27.625	28.375	29.0417	1.64912	1.60013	1.62013	1.62312	52.9839	57.9231	57.0969	56.0013	60	59	59	59.3333	119	129	121	123	22.9	23.8	23.9	23.6	3.4	3.5	3.5	3.5	9.3	9.4	9.4	9.4	1.7	1.6	1.6	1.7	2.7	2.7	2.7	2.7	21.625	21.625	22.375	21.875	56
DP527-150	22.5	22	23.5	22.6667	37	35	35.5	35.8333	2.18675	2.1215	1.9645	2.09092	59.1014	60.6143	55.338	58.3512	66	65	69	66.6667	128	124	115	122.333	24.8	25.6	23.5	24.6	3.6	3.6	3.5	3.5	9.6	9.9	9.4	9.6	1.7	1.7	1.7	1.7	2.7	2.8	2.7	2.7	22.5	21.25	25	22.9167	91
DP527-151	18.375	16.75	18.5	17.875	37.875	36.125	38.25	37.4167	1.86125	1.76838	1.82113	1.81692	49.1419	48.9516	47.6111	48.5682	62	60	60	60.6667	104	103	101	102.667	21.2	21.7	20.6	21.2	3.4	3.5	3.4	3.4	8.5	8.5	8.5	8.5	1.6	1.6	1.6	1.6	2.5	2.5	2.5	2.5	21.375	21.125	21.625	21.375	64
DP527-152	17.5	16.5	16.625	16.875	27.125	28.125	23.75	26.3333	1.367	1.49325	1.0995	1.31992	50.3963	53.0933	46.2947	49.9281	63	62	64	63	97	99	105	100.333	22.1	22.4	21.3	21.9	3.6	3.6	3.6	3.6	8.6	8.6	8.4	8.5	1.6	1.5	1.5	1.6	2.4	2.4	2.4	2.4	19.875	20.625	19.875	20.125	62
DP527-153	17.75	17.625	18.25	17.875	28.875	28.625	28.875	28.7917	1.391	1.35512	1.33537	1.3605	48.1732	47.3406	46.2468	47.2535	62	60	61	61	115	112	117	114.667	22	21.5	21.1	21.5	3.5	3.4	3.4	3.4	8.9	8.9	8.9	8.9	1.6	1.7	1.7	1.7	2.6	2.7	2.6	2.6	22.875	24.125	23.25	23.4167	59
DP527-154	16.75	17.625	18.75	17.7083	27.75	28.375	31.125	29.0833	1.42512	1.54375	1.64263	1.53717	51.3559	54.4053	52.7751	52.8454	59	61	59	59.6667	110	114	108	110.667	21.3	22.3	21.7	21.8	3.3	3.4	3.3	3.3	9.1	9.2	9.1	9.1	1.7	1.7	1.7	1.7	2.8	2.7	2.7	2.7	20.375	20.75	21.25	20.7917	52
DP527-155	18.125	18	18.875	18.3333	30.625	33	37.25	33.625	1.76513	2.05325	2.18312	2.0005	57.6367	62.2197	58.6074	59.4879	65	63	62	63.3333	119	114	123	118.667	25	25.7	25.4	25.4	3.6	3.6	3.6	3.6	9.8	9.9	9.8	9.9	1.7	1.7	1.7	1.7	2.7	2.8	2.7	2.7	20.25	18.375	20.375	19.6667	55
DP527-156	20.5	18.75	20.5	19.9167	36.25	29	34.5	33.25	1.51438	1.23125	1.42613	1.39058	41.7759	42.4569	41.337	41.8566	63	62	62	62.3333	104	105	119	109.333	18.4	18.2	18.2	18.3	3.2	3.2	3.2	3.2	7.8	7.9	7.8	7.8	1.5	1.6	1.6	1.6	2.4	2.5	2.4	2.5	21.875	21.875	22.625	22.125	58
DP527-157	19	16.75	18.25	18	42.125	37	38.5	39.2083	1.91538	1.81963	1.82825	1.85442	45.4688	49.1791	47.487	47.3783	66	59	63	62.6667	117	112	111	113.333	20	21.1	20.6	20.6	3.4	3.5	3.5	3.4	8.2	8.4	8.2	8.3	1.5	1.5	1.5	1.5	2.4	2.4	2.4	2.4	19.625	20	21.125	20.25	55
DP527-158	17.625	16	17.125	16.9167	30.625	31.5	28.875	30.3333	1.79025	1.85862	1.5935	1.74746	58.4571	59.004	55.1861	57.5491	59	58	58	58.3333	110	113	114	112.333	24.1	25.3	23.6	24.3	3.5	3.7	3.5	3.5	9.4	9.5	9.4	9.4	1.6	1.6	1.7	1.6	2.7	2.6	2.7	2.7	19.25	15.75	15.125	16.7083	62
DP527-159	15.375	15.125	15.375	15.2917	27.625	31	32.5	30.375	1.44063	1.59262	1.66075	1.56467	52.1493	51.375	51.1	51.5414	62	59	59	60	100	101	104	101.667	22.4	22.1	21.9	22.2	3.5	3.5	3.5	3.5	9	8.9	8.8	8.9	1.6	1.6	1.6	1.6	2.6	2.6	2.5	2.6	17.875	18.5	18.75	18.375	62
DP527-160	17.375	16.625	18.375	17.4583	26.625	26.375	29.5	27.5	1.25375	1.33525	1.52887	1.37262	47.0892	50.6256	51.8263	49.847	59	58	60	59	101	100	100	100.333	21.3	21.8	21.9	21.7	3.3	3.3	3.4	3.3	9	9.1	9	9.1	1.7	1.7	1.7	1.7	2.8	2.8	2.7	2.7	21	21.75	20.75	21.1667	59
DP527-161	21.625	17.5	20.875	20	49	36.25	37.25	40.8333	1.96762	1.78725	1.8455	1.86679	40.1556	49.3034	49.5436	46.3342	66	60	63	63	106	97	107	103.333	18.6	21.1	20.4	20	3.1	3.3	3.3	3.2	8.2	8.7	8.4	8.4	1.7	1.6	1.6	1.6	2.7	2.7	2.6	2.6	22	20.5	24.5	22.3333	64
DP527-162	19.625	18.25	18.625	18.8333	39.75	30.5	36.875	35.7083	2.162	1.61725	1.89787	1.89237	54.3899	53.0246	51.4678	52.9608	63	59	59	60.3333	132	129	131	130.667	22.6	21.9	21.7	22.1	3.6	3.5	3.5	3.5	8.7	8.6	8.5	8.6	1.6	1.6	1.6	1.6	2.5	2.5	2.5	2.5	23.75	22.25	21.5	22.5	55
DP527-163	15.5	14.875	14.875	15.0833	28.75	25.375	27.75	27.2917	1.44613	1.36738	1.45025	1.42125	50.3	53.8867	52.2613	52.1493	58	56	56	56.6667	113	105	117	111.667	22	22.1	21.8	22	3.5	3.4	3.5	3.5	8.6	8.6	8.4	8.5	1.6	1.6	1.5	1.6	2.5	2.5	2.4	2.5	17.75	17.875	16.625	17.4167	51
DP527-164	19.25	17.375	19.125	18.5833	34.625	29.25	35.5	33.125	2.00838	1.65813	2.05762	1.90804	58.0036	56.688	57.9613	57.551	61	66	60	62.3333	119	109	122	116.667	24	24.2	24.2	24.1	3.5	3.5	3.5	3.5	9.7	9.9	9.8	9.8	1.7	1.8	1.7	1.7	2.8	2.9	2.8	2.8	22.75	22.375	23.125	22.75	61
DP527-165	NA	18.375	19.375	18.875	NA	26.5	28.75	27.625	NA	1.32175	1.30375	1.31275	NA	49.8774	45.3478	47.6126	72	62	60	64.6667	89	103	111	101	NA	20.9	20.1	20.5	NA	3.4	3.3	3.4	NA	8.5	8.4	8.5	NA	1.6	1.6	1.6	NA	2.5	2.5	2.5	23.25	24	23.5	23.5833	55
DP527-166	20.375	19.75	21.875	20.6667	32.375	25.875	38	32.0833	1.72225	1.3245	1.88837	1.64504	53.1969	51.1884	49.6941	51.3598	59	56	63	59.3333	103	100	101	101.333	23.7	22.7	22.6	23	3.4	3.3	3.3	3.3	9.6	9.6	9.5	9.6	1.7	1.8	1.8	1.8	2.8	3	2.9	2.9	23.75	23.375	24	23.7083	55
DP527-167	19.375	16.25	19.5	18.375	33	26.5	27.75	29.0833	1.3615	1.20287	1.21263	1.259	41.2576	45.3915	43.6982	43.4491	60	60	62	60.6667	130	115	121	122	20.5	21.3	20.8	20.9	3.4	3.4	3.4	3.4	8.5	8.7	8.5	8.6	1.6	1.6	1.6	1.6	2.6	2.6	2.5	2.5	19.375	19.875	19.5	19.5833	60
DP527-168	18	16.625	17.625	17.4167	35.375	27.625	33.25	32.0833	1.94588	1.46225	1.83375	1.74729	55.0071	52.9321	55.1504	54.3632	62	60	63	61.6667	98	91	103	97.3333	22.7	23.4	22.6	22.9	3.7	3.7	3.7	3.7	8.4	8.7	8.4	8.5	1.5	1.5	1.5	1.5	2.3	2.4	2.3	2.3	16.875	18.75	18.125	17.9167	66
DP527-169	17.25	16	17.125	16.7917	28.5	27.5	28.125	28.0417	1.424	1.43538	1.43263	1.43067	49.9649	52.1955	50.9378	51.0327	64	63	64	63.6667	101	106	106	104.333	21.2	21.8	20.8	21.3	3.6	3.7	3.5	3.6	8.1	8.2	8.1	8.1	1.5	1.5	1.5	1.5	2.3	2.3	2.3	2.3	21	21.25	20.5	20.9167	63
DP527-170	18.375	17.625	19.25	18.4167	37.375	30.5	43.375	37.0833	1.98588	1.56862	2.20987	1.92146	53.1338	51.4303	50.9481	51.8374	61	58	60	59.6667	98	96	102	98.6667	23.3	22.5	22.3	22.7	3.6	3.5	3.5	3.5	9.2	9.2	9	9.1	1.7	1.7	1.7	1.7	2.6	2.7	2.6	2.6	19.75	21	21.125	20.625	56
DP527-171	17.625	17.875	18.5	18	28.125	25.375	26.125	26.5417	1.46338	1.30638	1.20125	1.32367	52.0311	51.4828	45.9809	49.8316	56	54	56	55.3333	90	89	91	90	22.4	22	21.2	21.9	3.5	3.4	3.3	3.4	8.9	9	8.8	8.9	1.6	1.7	1.6	1.6	2.6	2.7	2.7	2.7	20.5	20.5	19	20	55
DP527-172	20.5	19	21.75	20.4167	36.125	33.375	41.5	37	1.41175	1.33912	1.88813	1.54633	39.0796	40.1236	45.497	41.5667	60	58	62	60	94	89	94	92.3333	18.8	19.1	20	19.3	3.2	3.2	3.4	3.3	8.3	8.2	8.3	8.3	1.7	1.6	1.6	1.6	2.6	2.6	2.5	2.6	22.25	22.375	22.75	22.4583	59
DP527-173	19.875	19.625	21.125	20.2083	28	25.625	27.375	27	1.53337	1.38637	1.45463	1.45812	54.7634	54.1024	53.137	54.0009	59	58	60	59	109	109	113	110.333	23.5	23.8	23.2	23.5	3.5	3.5	3.5	3.5	9.2	9.1	9	9.1	1.6	1.6	1.6	1.6	2.7	2.6	2.6	2.6	21.625	21.125	21.25	21.3333	58
DP527-174	22	19.375	NA	20.6875	33.25	30.625	27.125	30.3333	1.53825	1.46388	1.28687	1.42967	46.2632	47.8	47.4424	47.1685	64	63	63	63.3333	120	122	126	122.667	21.4	22	21.5	21.6	3.3	3.4	3.4	3.4	8.9	8.9	8.7	8.8	1.7	1.6	1.6	1.6	2.7	2.6	2.6	2.6	22.125	23.25	23.125	22.8333	61
DP527-175	21.75	19.75	21.375	20.9583	37.25	32	35.875	35.0417	2.05538	1.84013	1.94837	1.94796	55.1779	57.5039	54.3101	55.664	65	62	64	63.6667	132	133	136	133.667	22.5	23	22.4	22.6	3.5	3.6	3.5	3.5	9.1	9.1	9	9.1	1.6	1.6	1.6	1.6	2.6	2.5	2.6	2.6	24.375	24	23.625	24	71
DP527-176	17.25	17	17.625	17.2917	36.5	34.5	39.375	36.7917	1.91375	1.71625	2.12275	1.91758	52.4315	49.7464	53.9111	52.0297	60	61	60	60.3333	98	95	100	97.6667	22.9	22.9	23	22.9	3.4	3.4	3.5	3.4	9.2	9.2	9.2	9.2	1.7	1.7	1.7	1.7	2.7	2.7	2.7	2.7	19.5	18.625	20	19.375	58
DP527-177	19	17.25	21.625	19.2917	30.375	30.125	36.75	32.4167	1.8025	1.85238	2.1125	1.92246	59.3416	61.4896	57.483	59.4381	65	62	66	64.3333	112	112	118	114	25.1	25.8	24.9	25.3	3.6	3.7	3.6	3.7	9.6	9.6	9.5	9.6	1.6	1.6	1.6	1.6	2.6	2.6	2.6	2.6	24.375	23.625	23.625	23.875	65
DP527-178	19	17.375	19.625	18.6667	40.75	32.75	40.875	38.125	1.86237	1.5675	1.91	1.77996	45.7025	47.8626	46.7278	46.7643	64	60	63	62.3333	109	103	103	105	20.1	20.8	20.7	20.6	3.2	3.2	3.3	3.2	8.6	8.8	8.7	8.7	1.6	1.7	1.6	1.7	2.7	2.7	2.7	2.7	23.5	20.75	21.125	21.7917	60
DP527-179	NA	NA	NA	NA	NA	NA	NA	NA	NA	NA	NA	NA	NA	NA	NA	NA	NA	NA	NA	NA	NA	NA	NA	NA	NA	NA	NA	NA	NA	NA	NA	NA	NA	NA	NA	NA	NA	NA	NA	NA	NA	NA	NA	NA	16.375	19.375	18.375	18.0417	65
DP527-180	17.375	17.875	18.625	17.9583	28.375	29.75	28.875	29	1.28937	1.37187	1.33225	1.33117	45.4405	46.1134	46.1385	45.8975	66	65	66	65.6667	120	116	122	119.333	19.9	20.7	20.4	20.3	3.4	3.5	3.4	3.4	8.3	8.4	8.3	8.3	1.6	1.6	1.6	1.6	2.5	2.4	2.5	2.5	22.25	21.25	20.125	21.2083	71
DP527-181	17.375	16.625	18	17.3333	32.125	28.625	29.875	30.2083	1.58975	1.43425	1.45112	1.49171	49.4864	50.1048	48.5732	49.3881	59	59	59	59	107	108	108	107.667	20.6	20.5	20.5	20.5	3.5	3.5	3.4	3.5	8	8	8	8	1.5	1.5	1.5	1.5	2.3	2.3	2.3	2.3	23.625	22.875	23.75	23.4167	59
DP527-182	18	18.875	19.25	18.7083	31.75	32.125	33.125	32.3333	1.553	1.60537	1.63387	1.59742	48.9134	49.9728	49.3245	49.4036	60	60	60	60	113	116	116	115	20.3	20.5	20.8	20.5	3.3	3.4	3.4	3.4	8.5	8.4	8.4	8.4	1.6	1.6	1.6	1.6	2.5	2.5	2.5	2.5	23.625	24.625	24.375	24.2083	59
DP527-183	16.75	16.625	20.125	17.8333	29.375	26.75	36.375	30.8333	1.61187	1.38525	1.959	1.65204	54.8723	51.785	53.8557	53.5044	59	59	62	60	111	102	111	108	22.9	22.1	23.1	22.7	3.4	3.4	3.5	3.4	9.3	9	9.2	9.2	1.7	1.6	1.7	1.7	2.7	2.7	2.7	2.7	22.25	20.5	21.25	21.3333	55
DP527-184	23.5	20.375	24.375	22.75	42.125	33.5	39.5	38.375	2.32525	1.74425	1.93887	2.00279	55.1988	52.0672	49.0854	52.1171	64	65	64	64.3333	119	118	122	119.667	22.3	21.3	21.1	21.6	3.4	3.3	3.3	3.4	9.1	8.9	8.9	9	1.7	1.7	1.7	1.7	2.7	2.7	2.7	2.7	22.375	22.25	22.75	22.4583	63
DP527-185	19.5	23.875	20.25	21.2083	31.25	46.5	32.375	36.7083	1.85638	2.0125	1.936	1.93496	59.404	43.2796	59.7992	54.1609	63	61	61	61.6667	126	122	127	125	25	19.5	24.8	23.1	3.6	3.1	3.7	3.5	9.8	8.6	9.5	9.3	1.7	1.7	1.6	1.7	2.7	2.8	2.6	2.7	22.375	20.375	23	21.9167	60
DP527-186	16.75	16	17.375	16.7083	27.375	24	27.625	26.3333	1.43138	1.19663	1.39325	1.34042	52.2877	49.8594	50.4344	50.8605	60	60	61	60.3333	106	109	104	106.333	22.3	22.5	22.5	22.4	3.7	3.7	3.8	3.7	8.5	8.4	8.4	8.4	1.5	1.5	1.5	1.5	2.3	2.3	2.3	2.3	19	18.75	19.375	19.0417	63
DP527-187	21.125	21	23.625	21.9167	46.375	37.25	45.5	43.0417	2.41162	1.9515	2.417	2.26004	52.0027	52.3893	53.1209	52.5043	66	67	66	66.3333	117	114	109	113.333	22	22.6	22.3	22.3	3.3	3.4	3.4	3.3	9.3	9.5	9.4	9.4	1.7	1.7	1.7	1.7	2.8	2.8	2.8	2.8	24	20	23.75	22.5833	78
DP527-188	17.875	16.125	18	17.3333	30.75	26.75	33.875	30.4583	1.8435	1.58288	1.926	1.78412	59.9512	59.1729	56.8561	58.6601	63	62	64	63	105	104	102	103.667	24.5	24.4	24.5	24.5	3.7	3.7	3.7	3.7	9.4	9.5	9.4	9.4	1.6	1.6	1.6	1.6	2.6	2.6	2.6	2.6	21.875	20.75	22.125	21.5833	70
DP527-189	18.375	19.375	19	18.9167	37.25	36.125	40.625	38	1.975	1.859	2.02862	1.95421	53.0201	51.4602	49.9354	51.4719	63	62	62	62.3333	111	102	107	106.667	21.5	21.3	21	21.3	3.5	3.4	3.5	3.5	8.3	8.3	8.2	8.2	1.5	1.5	1.5	1.5	2.4	2.4	2.4	2.4	24.75	22.625	22.625	23.3333	71
DP527-190	19	20.125	19.75	19.625	33.625	31.5	34.125	33.0833	1.9515	1.7205	1.88738	1.85312	58.0372	54.619	55.3077	55.988	64	63	64	63.6667	118	109	120	115.667	23.4	22.6	22.9	23	3.5	3.5	3.5	3.5	9.1	9	9	9	1.6	1.6	1.6	1.6	2.6	2.6	2.6	2.6	19.875	19.5	21.75	20.375	86
DP527-191	21.625	17.25	21.625	20.1667	52	47.75	58.5	52.75	2.37038	2.44588	2.643	2.48642	45.5841	51.2225	45.1795	47.3287	66	66	67	66.3333	114	111	116	113.667	19.6	21.7	20.3	20.5	3.2	3.4	3.3	3.3	8.2	8.5	8.3	8.3	1.6	1.6	1.6	1.6	2.6	2.5	2.5	2.6	21.375	20.5	21.75	21.2083	70
DP527-192	17.5	18.25	19.5	18.4167	31.75	31.375	37.125	33.4167	1.48663	1.50875	1.83025	1.60854	46.8228	48.0876	49.2997	48.07	64	64	66	64.6667	101	97	102	100	20.8	21	21.5	21.1	3.2	3.3	3.3	3.3	8.7	8.6	8.7	8.7	1.7	1.6	1.6	1.6	2.7	2.6	2.6	2.6	23	21.375	22.25	22.2083	61
DP527-193	17.625	18.25	19.125	18.3333	31.625	32.25	32.75	32.2083	1.875	1.79	1.84688	1.83729	59.2885	55.5039	56.3931	57.0618	63	60	63	62	127	134	133	131.333	24	22.8	23.2	23.3	3.7	3.6	3.6	3.6	9.3	9	9.2	9.2	1.6	1.6	1.6	1.6	2.5	2.5	2.6	2.6	18.875	20.875	20.375	20.0417	69
DP527-194	19.1667	20.25		19.7083	28.1667	30.125	31	29.7639	1.16817	1.34725	1.2025	1.23931	41.4734	44.722	38.7903	41.6619	73	64	72	69.6667	94	91	84	89.6667	20.1	21.4	20.5	20.7	3.2	3.3	3.3	3.3	8.4	8.7	8.4	8.5	1.6	1.6	1.6	1.6	2.6	2.6	2.5	2.6	17.25	16	17.375	16.875	70
DP527-195	18.375	17.5	18.5	18.125	39.375	35.875	34	36.4167	2.22038	2.02637	1.96487	2.07054	56.3905	56.4843	57.7904	56.8884	63	63	65	63.6667	125	124	126	125	22.1	23.4	23	22.8	3.6	3.8	3.6	3.7	8.4	8.5	8.5	8.5	1.5	1.5	1.5	1.5	2.4	2.3	2.4	2.3	22.125	17.5	21.25	20.2917	69
DP527-196	18.5	18.875	22.75	20.0417	42.625	40.625	59	47.4167	1.8615	1.8155	2.49538	2.05746	43.6716	44.6892	42.2945	43.5518	56	57	60	57.6667	93	93	101	95.6667	18.9	19.8	19.2	19.3	3.4	3.5	3.4	3.4	7.7	7.8	7.8	7.7	1.5	1.5	1.5	1.5	2.3	2.3	2.3	2.3	22.75	22.75	21.875	22.4583	52
DP527-197	18.75	18	21.375	19.375	34.25	31.5	36.75	34.1667	1.786	1.61975	1.9275	1.77775	52.146	51.4206	52.449	52.0052	65	63	66	64.6667	126	115	119	120	21.3	21.4	22.2	21.6	3.4	3.4	3.5	3.4	8.8	8.8	8.9	8.8	1.6	1.6	1.6	1.6	2.6	2.6	2.6	2.6	22.5	23.625	24.125	23.4167	62
DP527-198	18.25	16.125	16.75	17.0417	36.25	31.75	32.75	33.5833	1.77775	1.60813	1.58462	1.65683	49.0414	50.6496	48.3855	49.3588	62	61	62	61.6667	116	114	112	114	21.6	23	21.9	22.2	3.4	3.5	3.4	3.4	8.7	9	8.8	8.8	1.6	1.6	1.6	1.6	2.6	2.6	2.6	2.6	19.5	20.25	19.5	19.75	63
DP527-199	19.5	16.625	19.375	18.5	35	29.5	32.375	32.2917	1.683	1.397	1.61037	1.56346	48.0857	47.3559	49.7413	48.3943	64	63	64	63.6667	94	95	96	95	21	21.2	22.1	21.4	3.5	3.5	3.6	3.5	8.3	8.5	8.6	8.5	1.5	1.6	1.5	1.6	2.4	2.5	2.4	2.4	24.125	22.875	22	23	62
DP527-200	19.25	17	18.625	18.2917	30.875	31.25	35.25	32.4583	1.20463	1.43962	1.811	1.48508	39.0162	46.068	51.3759	45.4867	67	58	60	61.6667	100	100	102	100.667	17.9	21	19.5	19.5	3.1	3.4	3.2	3.2	7.7	8.2	8	8	1.6	1.6	1.6	1.6	2.5	2.5	2.5	2.5	21.875	21.5	23.125	22.1667	53
DP527-201	18.375	17.625	19.5	18.5	35.875	34.875	38.25	36.3333	1.9015	1.88888	2.16237	1.98425	53.0035	54.1613	56.5327	54.5658	61	60	62	61	115	106	110	110.333	23.2	23.7	24	23.6	3.3	3.4	3.5	3.4	9.5	9.5	9.5	9.5	1.7	1.7	1.7	1.7	2.9	2.8	2.8	2.8	23.75	21.25	20.875	21.9583	61
DP527-202	13	13	14.5	13.5	14.375	15.375	18	15.9167	0.63275	0.749125	0.81925	0.733708	44.0174	48.7236	45.5139	46.085	66	66	66	66	73	68	79	73.3333	19.5	21.1	20.7	20.4	3.1	3.2	3.2	3.2	8.6	8.9	8.8	8.7	1.7	1.7	1.7	1.7	2.8	2.7	2.8	2.8	22	17.375	21.5	20.2917	60
DP527-203	20	18.25	19.875	19.375	30.125	26.125	27.875	28.0417	1.78175	1.4765	1.64112	1.63312	59.1452	56.5167	58.8744	58.1788	63	61	62	62	129	123	125	125.667	23	22.7	23.4	23.1	3.7	3.6	3.7	3.6	8.8	8.7	8.9	8.8	1.6	1.5	1.6	1.5	2.4	2.4	2.4	2.4	27.125	17.375	26.6667	23.7222	63
DP527-204	17.875	17.5	18.75	18.0417	36.875	34.625	42.875	38.125	2.04787	1.85587	2.27862	2.06079	55.5356	53.5993	53.1458	54.0935	60	60	60	60	95	91	98	94.6667	23.3	23.5	23.5	23.4	3.4	3.3	3.4	3.4	9.4	9.4	9.3	9.4	1.7	1.7	1.7	1.7	2.8	2.8	2.8	2.8	23	20.875	26.375	23.4167	61
DP527-205	22.125	20.875	23.875	22.2917	33.75	29.875	33.875	32.5	1.6325	1.41712	1.58613	1.54525	48.3704	47.4351	46.8229	47.5428	67	64	64	65	127	115	125	122.333	19.8	20.3	20.2	20.1	3.3	3.3	3.3	3.3	8	8.3	8.2	8.2	1.5	1.6	1.6	1.5	2.4	2.5	2.4	2.5	25.625	22.25	25.875	24.5833
DP527-206	19.5	19.625	21.125	20.0833	26.125	29.125	26.75	27.3333	1.2875	1.422	1.30963	1.33971	49.2823	48.824	48.9579	49.0214	62	63	64	63	116	118	117	117	20.3	20.6	21	20.6	3.3	3.3	3.4	3.3	8.3	8.3	8.4	8.3	1.6	1.6	1.6	1.6	2.5	2.5	2.5	2.5	24.125	22.25	21.5	22.625	68
DP527-207	20.875	20.875	21.625	21.125	34.125	31.875	36.25	34.0833	1.83813	1.62312	1.95075	1.804	53.8645	50.9216	53.8138	52.8666	64	65	65	64.6667	95	91	95	93.6667	21.8	21.5	22.6	22	3.4	3.4	3.5	3.4	8.9	8.8	9	8.9	1.6	1.6	1.6	1.6	2.6	2.6	2.6	2.6	24.25	22.625	22.5	23.125	84
DP527-208	15.375	18.625	17.875	17.2917	27.875	33.875	32.375	31.375	1.58712	1.92788	1.81675	1.77725	56.9372	56.9114	56.1158	56.6548	64	67	65	65.3333	117	117	115	116.333	23.9	25.6	24.8	24.8	3.5	3.6	3.5	3.5	9.6	9.9	9.8	9.8	1.7	1.7	1.7	1.7	2.8	2.8	2.8	2.8	23.375	21.1429	22.6667	22.3948	91
DP527-209	16.875	16.25	18.125	17.0833	31.75	30.125	35.625	32.5	1.65187	1.42388	1.78475	1.62017	52.0276	47.2656	50.0982	49.7971	64	63	64	63.6667	108	105	111	108	21.6	20.8	20.9	21.1	3.5	3.4	3.5	3.5	8.4	8.4	8.3	8.4	1.5	1.6	1.5	1.5	2.4	2.5	2.4	2.4	19.625	19.25	18.625	19.1667	69
DP527-210	17.875	18.75	19.25	18.625	29.25	32.375	35	32.2083	1.68887	1.8085	2.0655	1.85429	57.7393	55.861	59.0143	57.5382	59	59	59	59	117	107	109	111	23.5	23.6	24.3	23.8	3.4	3.4	3.5	3.4	9.5	9.6	9.7	9.6	1.7	1.7	1.7	1.7	2.8	2.8	2.8	2.8	22.5	22.625	22.25	22.4583	60
DP527-211	18.625	19.5	22.375	20.1667	32.875	38.625	48.25	39.9167	1.76588	2.04712	2.55287	2.12196	53.7148	53	52.9093	53.2081	65	65	64	64.6667	121	126	129	125.333	21.2	21.5	21.7	21.5	3.5	3.5	3.5	3.5	8.4	8.5	8.5	8.5	1.5	1.6	1.5	1.5	2.4	2.5	2.4	2.4	24.25	26.125	26.5	25.625	91
DP527-212	16.75	16.125	18.25	17.0417	35.375	35.125	35.25	35.25	1.92375	1.78887	1.84088	1.85117	54.3816	50.9288	52.2234	52.5113	62	62	60	61.3333	100	102	99	100.333	23.1	22.6	22.7	22.8	3.4	3.4	3.4	3.4	8.9	8.9	9	8.9	1.6	1.6	1.6	1.6	2.6	2.6	2.7	2.6	22.5	19.5	21.625	21.2083	62
DP527-213	19.375	20.75	20	20.0417	30.625	32.375	30.25	31.0833	1.55475	1.68575	1.598	1.61283	50.7673	52.0695	52.8264	51.8878	66	67	66	66.3333	128	123	126	125.667	21.1	22.6	22.2	21.9	3.4	3.5	3.5	3.4	8.9	9	9	9	1.7	1.6	1.7	1.7	2.7	2.6	2.6	2.6	21	22.75		21.875	63
DP527-214	17.875	17.375	17.625	17.625	36.625	39.25	43.25	39.7083	1.7365	2.141	2.462	2.11317	47.413	54.5478	56.9249	52.9619	60	60	60	60	101	104	110	105	20.8	21.9	22.3	21.7	3.6	3.7	3.8	3.7	8.1	8.1	8.1	8.1	1.5	1.5	1.4	1.5	2.3	2.2	2.2	2.2	22.75	20.625	22.5	21.9583	61
DP527-215	18.75	18.375	21.375	19.5	35.875	31	40.875	35.9167	1.88037	1.58675	2.051	1.83937	52.4146	51.1855	50.1774	51.2592	61	62	67	63.3333	114	110	113	112.333	22.2	21.6	21.5	21.8	3.6	3.5	3.5	3.5	8.8	8.7	8.7	8.7	1.6	1.6	1.6	1.6	2.5	2.5	2.5	2.5	22	19.5	19.875	20.4583	65
DP527-216	16.875	14.75	17.375	16.3333	31.5	29.25	35.125	31.9583	1.579	1.60613	1.8215	1.66888	50.127	54.9103	51.8577	52.2983	60	60	64	61.3333	105	103	98	102	21.4	22.4	22.2	22	3.6	3.6	3.7	3.6	8.3	8.5	8.5	8.4	1.5	1.5	1.5	1.5	2.3	2.4	2.3	2.3	20.5	20.625	19	20.0417	53
DP527-217	18.75	17.875	18.75	18.4583	31	27.875	27.75	28.875	1.69312	1.46525	1.43125	1.52988	54.6169	52.565	51.5766	52.9195	64	59	62	61.6667	131	116	117	121.333	23	22.1	22.6	22.6	3.6	3.5	3.5	3.5	8.7	8.6	8.7	8.7	1.5	1.6	1.6	1.6	2.4	2.5	2.5	2.5	20.375	20.625	20.125	20.375	80
DP527-218	23.1429	23.75	26.375	24.4226	36.8571	38.5	29.5	34.9524	1.81486	1.72313	1.43775	1.65858	49.2403	44.7565	48.7373	47.578	70	70	72	70.6667	110	109	107	108.667	21.3	21.2	22.4	21.6	3.4	3.3	3.5	3.4	8.8	8.8	9.1	8.9	1.7	1.7	1.7	1.7	2.6	2.7	2.6	2.6	29	24.375	24.125	25.8333	NA
DP527-219	23.25	21.875	23.5	22.875	31.875	31.5	30.625	31.3333	1.67375	1.68063	1.53487	1.62975	52.5098	53.3532	50.1184	51.9938	68	67	71	68.6667	118	119	124	120.333	21.6	22	21.2	21.6	3.5	3.5	3.4	3.5	8.5	8.6	8.5	8.6	1.6	1.6	1.6	1.6	2.5	2.5	2.5	2.5	23.125	21.875	18.375	21.125	80
[truncated: 49 more columns]

## Sheet: Greenhouse data
	DTHGH18rep1	DTHGH18rep2	DTHGH18avg	PHTGH18rep1	PHTGH18rep2	PHTGH18avg	SPSGH18rep1	SPSGH18rep2	SPSGH18avg	KPSGH18rep1	KPSGH18rep2	KPSGH18avg	GWSGH18rep1	GWSGH18rep2	GWSGH18avg	TKWGH18rep1	TKWGH18rep2	TKWGH18avg	AreaGH18rep1	AreaGH18rep2	AreaGH18avg	WidthGH18rep1	WidthGH18rep2	WidthGH18avg	LengthGH18rep1	LengthGH18rep2	LengthGH18avg	CicularityGH18rep1	CircularityGH18rep2	CircularityGH18avg	L/WGH18rep1	L/WGH18rep2	L/WGH18avg	DTHGH19rep1	DTHGH19rep2	DTHGH19avg	PHTGH19rep1	PHTGH19rep2	PHTGH19avg	SPSGH19rep1	SPSGH19rep2	SPSGH19avg	KPSGH19rep1	KPSGH19rep2	KPSGH19avg	GWSGH19rep1	GWSGH19rep2	GWSGH19avg	TKWGH19rep1
DP527-001	64	63	63.5	97	115	106	20.75	21.25	21	32.25	36.5	34.375	1.5475	2.1875	1.8675	47.98	59.93	53.96	20	22.9	21.5	3.5	3.8	3.6	8	8.3	8.2	1.5	1.5	1.5	2.3	2.2	2.3	44	56	50	81	45	63	17.5	14.5	16	27.25	3.5	15.375	1.1675	0.105	0.63625	42.844
DP527-002	54	72	63	121	113	117	23.25	22.25	22.75	41.75	33	37.375	2.26	1.39	1.825	54.13	42.12	48.13	22.5	18.2	20.3	3.6	3.3	3.5	8.8	7.9	8.3	1.6	1.6	1.6	2.4	2.4	2.4	53	60	56.5	105	117	111	22.5	22.5	22.5	32.25	34.25	33.25	1.4975	1.5225	1.51	46.4341
DP527-003	69	79	74	121	121	121	27.25	26.5	26.875	38.5	41	39.75	1.8075	1.33	1.56875	46.95	32.44	39.69	19.5	17.7	18.6	3.6	3.3	3.4	7.7	7.6	7.7	1.5	1.5	1.5	2.2	2.3	2.3	72	70	71	86	96	91	20	21.6667	20.8333	29.75	36	32.875	0.6975	1.47667	1.08708	23.4454
DP527-004	71	69	70	128	140	134	31.75	31.25	31.5	34	40.75	37.375	1.7525	2.3825	2.0675	51.54	58.47	55.01	21.9	22.7	22.3	3.8	3.8	3.8	8.2	8.6	8.4	1.5	1.5	1.5	2.2	2.3	2.3	47	55	51	112	113	112.5	25.25	24.25	24.75	32	29.75	30.875	1.6775	1.05	1.36375	52.4219
DP527-005	76	75	75.5	133	141	137	22.5	23	22.75	36	44	40	1.5075	2.075	1.79125	41.88	47.16	44.52	17.3	18.5	17.9	3.2	3.4	3.3	7.4	7.5	7.5	1.5	1.5	1.5	2.3	2.2	2.3	62	61	61.5	106	118	112	20.5	20.25	20.375	35.75	31.5	33.625	1.5925	1.28	1.43625	44.5455
DP527-006	89	74	81.5	125	115	120	25.25	28.25	26.75	41.5	45	43.25	1.2675	1.7	1.48375	30.54	37.78	34.16	17.9	19.2	18.6	3.2	3.4	3.3	7.9	8	7.9	1.6	1.6	1.6	2.5	2.4	2.4	70	68	69	105	105	105	23.25	23	23.125	32.5	31.5	32	1.2475	1.0225	1.135	38.3846
DP527-007	76	81	78.5	105	106	105.5	23.25	24.25	23.75	33.75	39.5	36.625	1.2025	1.335	1.26875	35.63	33.8	34.71	16.5	17.3	16.9	3.2	3.2	3.2	7.2	7.8	7.5	1.5	1.6	1.5	2.2	2.5	2.4	63	74	68.5	88	90	89	19.5	18.5	19	27.5	25.25	26.375	1.1675	0.8425	1.005	42.4545
DP527-008	86	77	81.5	134	141	137.5	24.25	26	25.125	37.75	41.75	39.75	1.485	2.58	2.0325	39.34	61.8	50.57	20.3	23.4	21.9	3.3	3.7	3.5	8.8	9.1	8.9	1.7	1.6	1.6	2.7	2.5	2.6	68	58	63	118	114	116	23	18.5	20.75	28.6667	21.75	25.2083	1.50667	0.9875	1.24708	52.5581
DP527-009	81	83	82	140	111	125.5	28	25.25	26.625	46	33.25	39.625	2.17	1	1.585	47.17	30.08	38.62	19.1	15.9	17.5	3.5	3.2	3.4	7.7	7.1	7.4	1.5	1.5	1.5	2.2	2.2	2.2	68	70	69	111	102	106.5	20	20.25	20.125	30	29.5	29.75	1	0.5975	0.79875	33.3333
DP527-010	92	99	95.5	100	53	76.5	15.75	16	15.875	9.75	0.333333	5.04167	0.3525	0.01	0.18125	36.15	30	33.08	18	20.1	19.1	3.2	3.6	3.4	8	8.4	8.2	1.6	1.6	1.6	2.5	2.4	2.4	78	88	83	82	104	93	15.5	20.5	18	5.25	1.5	3.375	0.1675	0.015	0.09125	31.9048
DP527-011	76	88	82	122	140	131	25.5	24	24.75	27.75	16.5	22.125	1.51	0.395	0.9525	54.41	23.94	39.18	24.8	16.8	20.8	3.8	3	3.4	9	7.8	8.4	1.6	1.7	1.6	2.4	2.7	2.5	73	74	73.5	66	90	78	20.75	21	20.875	10.75	13.25	12	0.205	0.4125	0.30875	19.0698
DP527-012	73	69	71	119	135	127	28.25	29.25	28.75	25.5	36.75	31.125	1.34	1.6725	1.50625	52.55	45.51	49.03	21.8	21.7	21.7	3.6	3.5	3.5	8.5	8.8	8.7	1.6	1.6	1.6	2.4	2.6	2.5	58	62	60	98	113	105.5	23.5	24.75	24.125	30	32.75	31.375	1.365	1.625	1.495	45.5
DP527-013	77	80	78.5	108	116	112	28.75	29.5	29.125	46	50.5	48.25	1.9475	2.165	2.05625	42.34	42.87	42.6	19.4	19.5	19.4	3.4	3.4	3.4	7.9	7.9	7.9	1.5	1.5	1.5	2.4	2.3	2.4	77	74	75.5	62	69	65.5	22.75	25.75	24.25	4.75	16.75	10.75	0.135	0.705	0.42	28.4211
DP527-014	73	71	72	128	122	125	25.5	27.25	26.375	39	38.5	38.75	1.9725	1.53	1.75125	50.58	39.74	45.16	19.7	18.7	19.2	3.5	3.4	3.5	7.9	7.8	7.8	1.5	1.6	1.5	2.2	2.3	2.3	70	51	60.5	120	90	105	19.3333	19.5	19.4167	29.3333	23	26.1667	1.29	0.77	1.03	43.9773
DP527-015	71	82	76.5	112	108	110	25.5	25.5	25.5	37.25	20	28.625	1.8425	0.8175	1.33	49.46	40.88	45.17	21	19.6	20.3	3.4	3.4	3.4	8.6	8.2	8.4	1.6	1.6	1.6	2.5	2.4	2.5	71	69	70	80	88	84	18.6667	20.75	19.7083	5.66667	3.5	4.58333	0.223333	0.0925	0.157917	39.4118
DP527-016	75	83	79	144	154	149	28.75	30.25	29.5	44	45.5	44.75	1.89	1.575	1.7325	42.95	34.62	38.78	18.3	17	17.6	3.3	3.1	3.2	7.9	7.8	7.8	1.6	1.6	1.6	2.4	2.5	2.5	62	71	66.5	125	106	115.5	21	23.5	22.25	27.25	32.75	30	1.26	1.425	1.3425	46.2385
DP527-017	65	68	66.5	125	132	128.5	27.5	28.75	28.125	41	34.75	37.875	1.9325	1.945	1.93875	47.13	55.97	51.55	20.7	23.1	21.9	3.4	3.7	3.6	8.6	8.9	8.7	1.6	1.6	1.6	2.5	2.4	2.5	60	63	61.5	141	129	135	23.5	22.5	23	32	32.5	32.25	1.6	1.5525	1.57625	50
DP527-018	76	67	71.5	132	133	132.5	26.75	25.25	26	43.5	37.75	40.625	2.5075	2.2225	2.365	57.64	58.87	58.26	23	23	23	3.7	3.6	3.6	9.1	9.2	9.1	1.6	1.7	1.6	2.5	2.6	2.5	53	60	56.5	81	83	82	19	17.25	18.125	26.6667	22.75	24.7083	1.46667	0.995	1.23083	55
DP527-019	80	94	87	153	166	159.5	29.5	27.5	28.5	37.25	12.5	24.875	1.625	0.265	0.945	43.62	21.2	32.41	20	15.8	17.9	3.5	2.9	3.2	8.2	7.7	7.9	1.6	1.7	1.6	2.4	2.7	2.5	74	60	67	72	119	95.5	18.5	24	21.25	2.25	36.5	19.375	0.015	1.5525	0.78375	6.66667
DP527-020	70	74	72	90	113	101.5	18.75	23.75	21.25	14	14.5	14.25	0.59	0.5525	0.57125	42.14	38.1	40.12	18.6	18.6	18.6	3.4	3.4	3.4	7.5	7.6	7.6	1.5	1.5	1.5	2.2	2.3	2.2	54	59	56.5	67	90	78.5	17	19.6667	18.3333	10	9.33333	9.66667	0.3125	0.3	0.30625	31.25
DP527-021	70	82	76	115	133	124	26.25	24.25	25.25	30.5	37.5	34	1.9525	1.9275	1.94	64.02	51.4	57.71	25.9	22.3	24.1	3.7	3.3	3.5	9.8	9.5	9.6	1.7	1.8	1.7	2.7	2.9	2.8	86	59	72.5	98	85	91.5	20.25	18	19.125	14.75	25.25	20	0.55	1.0925	0.82125	37.2881
DP527-022	60	61	60.5	135	131	133	26.25	26.5	26.375	34	37.25	35.625	1.9725	2.3	2.13625	58.01	61.74	59.88	22.9	24.1	23.5	3.6	3.7	3.7	8.9	9.1	9	1.6	1.6	1.6	2.5	2.5	2.5	63	60	61.5	113	105	109	20	22	21	16.5	23	19.75	0.815	1.16	0.9875	49.3939
DP527-023	83	79	81	155	155	155	26	26	26	42.5	37.25	39.875	1.7825	1.495	1.63875	41.94	40.13	41.04	19.7	18.9	19.3	3.3	3.3	3.3	8.5	8.2	8.4	1.7	1.6	1.6	2.6	2.5	2.6	69	64	66.5	141	137	139	22	23.75	22.875	26.25	17	21.625	1.075	0.645	0.86	40.9524
DP527-024	82	79	80.5	142	143	142.5	24	26	25	39.5	42.5	41	2.12	2.185	2.1525	53.67	51.41	52.54	22.6	22.1	22.4	3.6	3.5	3.6	8.8	8.8	8.8	1.6	1.6	1.6	2.5	2.5	2.5	73	62	67.5	100	111	105.5	22	22.5	22.25	30.25	32	31.125	1.03	1.0175	1.02375	34.0496
DP527-025	67	71	69	115	107	111	24.5	22.25	23.375	37.75	36	36.875	2.1825	2.1425	2.1625	57.81	59.51	58.66	22.3	22.1	22.2	3.8	3.8	3.8	8.1	8.2	8.2	1.4	1.5	1.5	2.1	2.2	2.2	84	68	76	84	92	88	18	19.25	18.625	22.75	29.25	26	0.52	1.0975	0.80875	22.8571
DP527-026	76	79	77.5	105	110	107.5	24.75	29	26.875	26	NA	26	1.315	NA	1.315	50.58	NA	50.58	21.3	NA	21.3	3.8	NA	3.8	8	NA	8	1.5	NA	1.5	2.1	NA	2.1	70	62	66	87	83	85	22.25	23.25	22.75	0.25	30.5	15.375	0.005	1.145	0.575	20
DP527-027	64	65	64.5	114	130	122	26.75	29.25	28	30.75	41.75	36.25	1.7225	2.06	1.89125	56.02	49.34	52.68	22.3	20.1	21.2	3.6	3.4	3.5	8.6	8.2	8.4	1.5	1.5	1.5	2.4	2.4	2.4	44	61	52.5	99	100	99.5	21	25	23	12.25	23.5	17.875	0.5775	0.945	0.76125	47.1429
DP527-028	79		79	100	120	110	27.75	29.25	28.5	30.5	29.75	30.125	0.925	0.505	0.715	30.33	16.97	23.65	15.8	12.1	13.9	3.2	2.6	2.9	6.9	6.5	6.7	1.5	1.7	1.6	2.2	2.5	2.3	64	75	69.5	113	108	110.5	26.25	22	24.125	39	22.75	30.875	1.3725	0.68	1.02625	35.1923
DP527-029	77	75	76	115	123	119	27.75	28.25	28	36.5	38	37.25	0.92	1.545	1.2325	25.21	40.66	32.93	17	20	18.5	3.1	3.4	3.2	7.9	8.5	8.2	1.7	1.6	1.7	2.6	2.5	2.6	74	79	76.5	89	96	92.5	20.25	22	21.125	26.5	32.25	29.375	1.0475	1.0975	1.0725	39.5283
DP527-030	68	71	69.5	134	147	140.5	27.25	25.25	26.25	35.25	30.75	33	1.55	1.4025	1.47625	43.97	45.61	44.79	18.5	20	19.3	3.4	3.5	3.4	7.6	7.9	7.8	1.5	1.5	1.5	2.3	2.3	2.3	64	58	61	138	119	128.5	25	19.75	22.375	35.75	23.75	29.75	1.5925	0.9125	1.2525	44.5455
DP527-031	65	75	70	105	118	111.5	23.5	26.5	25	35.75	42	38.875	1.6425	1.935	1.78875	45.94	46.07	46.01	19.7	19.8	19.7	3.5	3.6	3.5	8.1	7.9	8	1.6	1.5	1.5	2.4	2.2	2.3	62	64	63	82	87	84.5	20.25	21	20.625	27.75	29	28.375	1.1375	0.9625	1.05	40.991
DP527-032	60	74	67	116	118	117	24.25	25.25	24.75	39.25	39.5	39.375	2.3725	1.9675	2.17	60.45	49.81	55.13	22.9	20.2	21.5	3.6	3.4	3.5	8.8	8.3	8.6	1.5	1.6	1.6	2.4	2.5	2.5	66	74	70	100	107	103.5	23.75	21.75	22.75	29.75	33.5	31.625	1.2825	1.535	1.40875	43.1092
DP527-033	NA	90	90	106	123	114.5	20.3333	25.5	22.9167	26	40	33	0.836667	1.6075	1.22208	32.18	40.19	36.18	18.8	19.2	19	3.4	3.5	3.5	7.8	7.9	7.9	1.6	1.6	1.6	2.3	2.3	2.3	74	63	68.5	106	101	103.5	21.75	22	21.875	23.5	28.25	25.875	0.8975	1.305	1.10125	38.1915
DP527-034	68	70	69	137	128	132.5	25.75	25.75	25.75	32.75	28	30.375	2.03	1.8625	1.94625	61.98	66.52	64.25	24.7	27.2	26	3.7	3.9	3.8	9.4	9.9	9.7	1.6	1.6	1.6	2.6	2.6	2.6	60	61	60.5	115	114	114.5	21.5	22.6667	22.0833	11.25	7	9.125	0.495	0.326667	0.410833	44
DP527-035	73	71	72	130	139	134.5	21	24.25	22.625	19.3333	45.25	32.2917	1.01	2.43	1.72	52.24	53.7	52.97	21.2	20.8	21	3.5	3.4	3.5	8.3	8.4	8.4	1.5	1.6	1.6	2.4	2.5	2.4	NA	NA	NA	NA	NA	NA	NA	NA	NA	NA	NA	NA	NA	NA	NA	NA
DP527-036	72	75	73.5	143	123	133	26.5	24.75	25.625	44.75	35.25	40	1.88	1.1125	1.49625	42.01	31.56	36.79	19.1	17.3	18.2	3.3	3.2	3.3	8.1	7.9	8	1.6	1.7	1.6	2.4	2.5	2.5	65	86	75.5	120	95	107.5	19.75	21	20.375	27.5	19	23.25	0.61	0.28	0.445	22.1818
DP527-037	63	68	65.5	111	125	118	24	24.75	24.375	37.25	35.25	36.25	2.0225	1.4325	1.7275	54.3	40.64	47.47	21.3	18.1	19.7	3.6	3.3	3.4	8.3	7.8	8	1.5	1.6	1.5	2.3	2.4	2.4	56	51	53.5	83	93	88	20	19.5	19.75	18.5	25.5	22	0.68	1.0275	0.85375	36.7568
DP527-038	66	65	65.5	153	142	147.5	26.25	26.75	26.5	41.75	43.5	42.625	2.345	2.1375	2.24125	56.17	49.14	52.65	21.5	19.6	20.6	3.7	3.6	3.7	8.2	7.9	8	1.5	1.5	1.5	2.2	2.2	2.2	54	56	55	133	115	124	18.75	21	19.875	29.25	31	30.125	1.275	1.2925	1.28375	43.5897
DP527-039	67	72	69.5	118	133	125.5	20.75	23	21.875	33.5	39.25	36.375	1.585	2.14	1.8625	47.31	54.52	50.92	19.2	21.9	20.6	3.5	3.8	3.7	7.9	8.2	8	1.5	1.5	1.5	2.3	2.2	2.2	69	53	61	85	115	100	14.5	17.25	15.875	20.25	26.75	23.5	0.555	1.1375	0.84625	27.4074
DP527-040	72	74	73	177	166	171.5	29.25	25.75	27.5	41	39.5	40.25	2.2375	2.145	2.19125	54.57	54.3	54.44	20.5	20.5	20.5	3.6	3.6	3.6	8	8	8	1.5	1.5	1.5	2.2	2.2	2.2	56	63	59.5	138	135	136.5	21.75	21	21.375	26.25	22.3333	24.2917	1.17	0.88	1.025	44.5714
DP527-041	NA	NA	NA	NA	NA	NA	NA	NA	NA	NA	NA	NA	NA	NA	NA	NA	NA	NA	NA	NA	NA	NA	NA	NA	NA	NA	NA	NA	NA	NA	NA	NA	NA	NA	NA	NA	NA	NA	NA	NA	NA	NA	NA	NA	NA	NA	NA	NA	NA
DP527-042	65	65	65	115	113	114	21	20.75	20.875	35	34.75	34.875	1.32	1.73	1.525	37.71	49.78	43.75	21	23.4	22.2	3.4	3.6	3.5	8.8	9.2	9	1.7	1.6	1.7	2.7	2.6	2.6	47	54	50.5	90	92	91	19	17.75	18.375	23.75	22	22.875	1.1175	0.9025	1.01	47.0526
DP527-043	59	69	64	138	160	149	26.5	26	26.25	44.5	45.25	44.875	2.5175	2.62	2.56875	56.57	57.9	57.24	22.6	22.5	22.6	3.5	3.5	3.5	8.8	8.8	8.8	1.6	1.6	1.6	2.5	2.5	2.5	68	58	63	141	123	132	21.25	20.5	20.875	30.5	27	28.75	1.1875	1.19	1.18875	38.9344
DP527-044	72	87	79.5	168	182	175	26.5	27.5	27	47	43.25	45.125	1.9275	2.2025	2.065	41.01	50.92	45.97	19.9	20.6	20.2	3.2	3.4	3.3	8.6	8.5	8.6	1.7	1.6	1.7	2.7	2.5	2.6	NA	65	65	NA	140	140	NA	24.25	24.25	NA	29.75	29.75	NA	1.29	1.29	NA
DP527-045	78	75	76.5	110	96	103	26.25	25.25	25.75	40.75	36.75	38.75	1.6275	1.405	1.51625	39.94	38.23	39.08	17.5	17.6	17.5	3.2	3.2	3.2	7.5	7.6	7.6	1.5	1.5	1.5	2.4	2.4	2.4	68	56	62	70	70	70	21	19	20	20.75	16.75	18.75	0.9475	0.585	0.76625	45.6627
DP527-046	75	77	76	116	136	126	28	30	29	28.75	29.25	29	1.5725	1.37	1.47125	54.7	46.84	50.77	23.3	21.8	22.5	3.6	3.6	3.6	8.9	8.5	8.7	1.6	1.6	1.6	2.5	2.4	2.4	69	84	76.5	123	118	120.5	24	22	23	36	30.25	33.125	1.9	1.3075	1.60375	52.7778
DP527-047	72	100	86	117	49	83	21.75	12.25	17	30.5	5.25	17.875	1.61	0.15	0.88	52.79	28.57	40.68	23.8	16.3	20.1	3.6	3	3.3	9.1	7.8	8.4	1.6	1.7	1.6	2.6	2.7	2.6	54	56	55	103	89	96	19.5	18.75	19.125	23.25	18.75	21	1.2	0.91	1.055	51.6129
DP527-048	63	61	62	99	120	109.5	22.25	20.3333	21.2917	34.25	44.6667	39.4583	1.6525	2.69333	2.17292	48.25	60.3	54.27	21.5	22.9	22.2	3.7	3.8	3.7	8.3	8.5	8.4	1.5	1.5	1.5	2.3	2.3	2.3	NA	56	56	NA	95	95	NA	20.75	20.75	NA	22.25	22.25	NA	0.9925	0.9925	NA
DP527-049	61	61	61	107	141	124	22.5	25.25	23.875	33	41.5	37.25	1.6475	2.36	2.00375	49.92	56.87	53.4	22	23.4	22.7	3.3	3.4	3.4	9.2	9.5	9.4	1.7	1.7	1.7	2.8	2.8	2.8	55	52	53.5	128	121	124.5	21.75	22	21.875	32.5	31	31.75	1.79	1.3325	1.56125	55.0769
DP527-050	65	71	68	113	116	114.5	26.5	28	27.25	43.25	46.75	45	1.695	2.015	1.855	39.19	43.1	41.15	16.3	17.5	16.9	3.2	3.4	3.3	7	7.2	7.1	1.5	1.4	1.5	2.2	2.1	2.2	54	70	62	108	106	107	22.25	23.25	22.75	32.5	30	31.25	1.195	1.0775	1.13625	36.7692
DP527-051	67	68	67.5	115	114	114.5	25.5	25.75	25.625	30.25	33.5	31.875	1.325	2.045	1.685	43.8	61.04	52.42	22.2	25.1	23.7	3.3	3.6	3.4	9.6	9.9	9.8	1.8	1.7	1.8	3	2.8	2.9	56	54	55	91	93	92	22.25	21.75	22	26	21.25	23.625	1.425	1.175	1.3	54.8077
DP527-052	76	91	83.5	103	175	139	27.25	33.5	30.375	16.5	42.25	29.375	0.7725	1.4575	1.115	46.82	34.5	40.66	20.3	16.7	18.5	3.5	3	3.3	8.1	7.9	8	1.5	1.7	1.6	2.3	2.6	2.5	64	73	68.5	111	121	116	21	21.75	21.375	18.25	22.75	20.5	0.7525	0.7475	0.75	41.2329
DP527-053	82	78	80	167	138	152.5	30	30.5	30.25	47.75	45	46.375	2.015	2.1125	2.06375	42.2	46.94	44.57	19.2	20.8	20	3.4	3.6	3.5	8.4	8.5	8.4	1.7	1.6	1.6	2.5	2.4	2.4	NA	54	54	91	117	104	28	23.75	25.875	NA	23.25	23.25	NA	1.0875	1.0875	NA
DP527-054	61	64	62.5	128	112	120	23.5	24.75	24.125	40	39	39.5	2.0725	2.0225	2.0475	51.81	51.86	51.84	20.6	20.7	20.7	3.5	3.5	3.5	8.2	8.1	8.2	1.5	1.5	1.5	2.4	2.3	2.4	48	49	48.5	98	91	94.5	22.75	20	21.375	40	30	35	1.52	1.3975	1.45875	38
DP527-055	66	55	60.5	155	142	148.5	25.75	22.25	24	40	34.5	37.25	2.2275	1.8875	2.0575	55.69	54.71	55.2	21.5	22.4	21.9	3.7	3.7	3.7	8.3	8.6	8.5	1.5	1.6	1.6	2.3	2.4	2.3	45	44	44.5	130	105	117.5	20.75	17.5	19.125	28.75	25.25	27	1.485	1.3125	1.39875	51.6522
DP527-056	59	63	61	117	121	119	22.5	24	23.25	30.25	31.5	30.875	1.425	1.645	1.535	47.11	52.22	49.66	19.5	21	20.3	3.3	3.6	3.5	8.2	8.2	8.2	1.6	1.5	1.5	2.5	2.3	2.4	56	52	54	85	102	93.5	19	20.75	19.875	21.25	27.5	24.375	0.7875	1.3175	1.0525	37.0588
DP527-057	86	78	82	138	105	121.5	24.75	20.5	22.625	40.5	27.25	33.875	1.6225	0.73	1.17625	40.06	26.79	33.43	20.1	17	18.6	3.3	2.9	3.1	8.5	8.1	8.3	1.6	1.7	1.7	2.6	2.8	2.7	NA	74	74	NA	101	101	NA	19.5	19.5	NA	24.25	24.25	NA	1.08	1.08	NA
DP527-058	63	63	63	137	125	131	26.75	26.5	26.625	41.5	41.5	41.5	2.1925	2.2275	2.21	52.83	53.67	53.25	22.9	22.5	22.7	3.5	3.5	3.5	9.4	9.2	9.3	1.7	1.7	1.7	2.7	2.7	2.7	52	NA	52	120	NA	120	21.75	NA	21.75	28.75	NA	28.75	1.3275	NA	1.3275	46.1739
DP527-059	94	84	89	118	117	117.5	27.75	28.75	28.25	37.75	43.5	40.625	1.1975	0.8575	1.0275	31.72	19.71	25.72	16.1	14.8	15.5	2.9	2.7	2.8	7.6	7.7	7.7	1.6	1.8	1.7	2.6	2.9	2.7	70	79	74.5	63	90	76.5	26	26.5	26.25	27.75	23	25.375	0.8925	0.8075	0.85	32.1622
DP527-060	72	79	75.5	104	105	104.5	27.25	29.25	28.25	40.25	44.5	42.375	2.2225	1.6725	1.9475	55.22	37.58	46.4	21.2	18.5	19.9	3.6	3.2	3.4	8.5	8.3	8.4	1.6	1.7	1.6	2.4	2.6	2.5	74	68	71	78	63	70.5	23.25	22.5	22.875	28.5	17	22.75	0.7025	0.51	0.60625	24.6491
DP527-061	66	77	71.5	146	160	153	27.5	27.5	27.5	41.5	41.25	41.375	2.5775	1.53	2.05375	62.11	37.09	49.6	24.4	18.1	21.2	3.7	3.2	3.4	9.1	8.1	8.6	1.6	1.7	1.6	2.5	2.6	2.5	68	63	65.5	141	150	145.5	24.25	22.75	23.5	23.5	24	23.75	1.0775	1.025	1.05125	45.8511
DP527-062	92	79	85.5	117	141	129	27	25.75	26.375	35.75	36.75	36.25	0.88	1.445	1.1625	24.62	39.32	31.97	15.4	18	16.7	3	3.3	3.2	7.2	7.6	7.4	1.6	1.5	1.6	2.4	2.3	2.4	71	69	70	105	84	94.5	19.5	16.6667	18.0833	29.25	18.3333	23.7917	1.1075	0.71	0.90875	37.8632
DP527-063	84	79	81.5	115	135	125	25.25	29.25	27.25	30.75	39.25	35	1.4	2.1525	1.77625	45.53	54.84	50.18	22.8	22.7	22.8	3.9	4	3.9	8.8	8.5	8.6	1.6	1.5	1.6	2.3	2.2	2.2	58	62	60	93	93	93	23.5	19.25	21.375	20.75	15	17.875	0.9725	0.755	0.86375	46.8675
DP527-064	66	61	63.5	123	108	115.5	24.75	24	24.375	39	36.5	37.75	2.115	1.93	2.0225	54.23	52.88	53.55	22.2	22.9	22.5	3.6	3.6	3.6	8.8	8.8	8.8	1.6	1.6	1.6	2.5	2.4	2.5	62	42	52	126	89	107.5	21	20.5	20.75	31.5	25.5	28.5	1.3175	1.36	1.33875	41.8254
DP527-065	NA	80	80	86	135	110.5	23	25.5	24.25	17.25	34.25	25.75	0.6175	1.185	0.90125	35.8	34.6	35.2	17	17.8	17.4	3.2	3.2	3.2	7.5	8	7.8	1.5	1.6	1.6	2.4	2.6	2.5	73	64	68.5	110	115	112.5	19.25	20	19.625	29	27.25	28.125	1.08	1.2475	1.16375	37.2414
DP527-066	65	69	67	135	135	135	24.25	25.5	24.875	34	41	37.5	1.495	1.965	1.73	43.97	47.93	45.95	20.8	21.1	20.9	3.3	3.3	3.3	8.7	8.8	8.8	1.7	1.7	1.7	2.7	2.7	2.7	61	58	59.5	126	110	118	21.75	21.5	21.625	33.25	20	26.625	1.355	0.9075	1.13125	40.7519
DP527-067	69	75	72	178	155	166.5	24.5	25	24.75	39.75	42.5	41.125	1.9025	2.39	2.14625	47.86	56.24	52.05	19.3	21.8	20.5	3.5	3.7	3.6	7.8	8.3	8.1	1.5	1.5	1.5	2.3	2.3	2.3	67	50	58.5	136	120	128	20	20.25	20.125	32.25	12	22.125	1.5825	0.4225	1.0025	49.0698
DP527-068	91	77	84	171	134	152.5	32	30.5	31.25	51.5	43.75	47.625	1.7375	1.4475	1.5925	33.74	33.09	33.41	17.2	18.3	17.7	3	3.2	3.1	8.1	8.2	8.2	1.7	1.7	1.7	2.7	2.6	2.6	88	65	76.5	125	104	114.5	26.3333	23	24.6667	13.3333	20.75	17.0417	0.576667	0.7575	0.667083	43.25
DP527-069	90	NA	90	112	73	92.5	19.75	18.25	19	5	NA	5	0.085	NA	0.085	17	NA	17	15.4	NA	15.4	3.1	NA	3.1	7.3	NA	7.3	1.6	NA	1.6	2.4	NA	2.4	86	NA	86	71	NA	71	16.25	NA	16.25	18	NA	18	0.74	NA	0.74	41.1111
DP527-070	83	74	78.5	137	142	139.5	28.5	29.5	29	33.5	34.5	34	1.235	1.8525	1.54375	36.87	53.7	45.28	17.8	22.2	20	3.2	3.6	3.4	7.7	8.5	8.1	1.6	1.6	1.6	2.4	2.3	2.4	59	67	63	121	115	118	22.5	21	21.75	30	24	27	1.1175	0.845	0.98125	37.25
DP527-071	84	90	87	121	131	126	26.5	26.75	26.625	40.25	43.25	41.75	1.555	1.4225	1.48875	38.63	32.89	35.76	19.1	17.7	18.4	3.1	3	3.1	8.7	8.4	8.6	1.8	1.8	1.8	2.8	2.8	2.8	61	81	71	82	73	77.5	21	21.6667	21.3333	32.25	19	25.625	1.4975	0.6	1.04875	46.4341
DP527-072	93	89	91	100	110	105	25.5	28	26.75	29.25	36	32.625	0.8575	1.24	1.04875	29.32	34.44	31.88	15.3	16.1	15.7	3.2	3.2	3.2	6.9	7.2	7	1.5	1.5	1.5	2.2	2.3	2.2	67	83	75	67	76	71.5	22.75	23	22.875	33.5	28	30.75	1.0575	0.6625	0.86	31.5672
DP527-073	82	76	79	139	141	140	26	26.5	26.25	33.75	38.75	36.25	1.31	1.6275	1.46875	38.81	42	40.41	19.7	19.9	19.8	3.4	3.4	3.4	8.6	8.4	8.5	1.7	1.6	1.7	2.6	2.5	2.5	82	71	76.5	88	89	88.5	21	23	22	5	10.75	7.875	0.12	0.35	0.235	24
DP527-074	68	71	69.5	135	157	146	28	28.75	28.375	40	42.75	41.375	2	2.13	2.065	50	49.82	49.91	21.6	21.1	21.4	3.4	3.4	3.4	9	8.8	8.9	1.7	1.7	1.7	2.6	2.6	2.6	50	57	53.5	128	131	129.5	19.75	20.75	20.25	27.75	27.25	27.5	1.29	1.2725	1.28125	46.4865
DP527-075	64	76	70	151	118	134.5	28.5	21.75	25.125	41.25	35.75	38.5	2.0975	1.545	1.82125	50.85	43.22	47.03	19.6	20.4	20	3.5	3.6	3.6	8.1	7.8	7.9	1.6	1.5	1.5	2.3	2.2	2.3	66	54	60	79	46	62.5	17.5	14.75	16.125	20.5	9.75	15.125	0.68	0.2575	0.46875	33.1707
DP527-076	90	90	90	125	81	103	24.25	23.6667	23.9583	37.25	13.3333	25.2917	1.1975	0.286667	0.742083	32.15	21.5	26.82	16.9	13.7	15.3	3.1	2.9	3	7.7	6.7	7.2	1.6	1.5	1.6	2.5	2.3	2.4	79	73	76	73	72	72.5	19.25	20	19.625	23.25	26.75	25	0.695	0.705	0.7	29.8925
DP527-077	86	83	84.5	145	143	144	28	27.25	27.625	43.25	43.75	43.5	1.2075	1.12	1.16375	27.92	25.6	26.76	16.6	15.5	16.1	3	2.9	2.9	7.8	7.6	7.7	1.7	1.7	1.7	2.6	2.7	2.7	78	NA	78	104	NA	104	22.25	NA	22.25	30.25	NA	30.25	0.96	NA	0.96	31.7355
DP527-078	70	75	72.5	99	133	116	20	22.25	21.125	26	42.25	34.125	1.1325	1.145	1.13875	43.56	27.1	35.33	20.7	17.4	19.1	3.4	3.1	3.2	8.5	8.2	8.4	1.6	1.7	1.7	2.5	2.7	2.6	82	77	79.5	84	100	92	17.3333	18.5	17.9167	34.6667	25.5	30.0833	1.31	0.9375	1.12375	37.7885
DP527-079	70	88	79	119	122	120.5	27	26.75	26.875	40.75	28.25	34.5	2.07	0.82	1.445	50.8	29.03	39.91	20.6	16.3	18.4	3.7	3.2	3.4	8.2	7.5	7.8	1.5	1.6	1.6	2.3	2.4	2.3	62	80	71	110	71	90.5	24	21.25	22.625	32	11.25	21.625	1.255	0.27	0.7625	39.2188
DP527-080	66	62	64	146	151	148.5	26.5	26.25	26.375	46.75	44.25	45.5	2.3825	2.35	2.36625	50.96	53.11	52.03	18.9	19.8	19.4	3.6	3.6	3.6	7.4	7.6	7.5	1.4	1.4	1.4	2.1	2.1	2.1	63	44	53.5	121	111	116	23.25	21.75	22.5	34.75	35	34.875	1.525	1.59	1.5575	43.8849
DP527-081	82	74	78	153	158	155.5	21	21	21	38.5	31	34.75	1.7375	1.435	1.58625	45.13	46.29	45.71	22	22	22	3.4	3.4	3.4	9.5	9.4	9.5	1.8	1.8	1.8	2.9	2.8	2.8	70	NA	70	119	NA	119	20.25	NA	20.25	23.75	NA	23.75	1.03	NA	1.03	43.3684
DP527-082	76	70	73	122	118	120	26.25	28.25	27.25	27	37.75	32.375	1.2425	1.9925	1.6175	46.02	52.78	49.4	19.3	21.4	20.3	3.6	3.8	3.7	7.6	8	7.8	1.5	1.5	1.5	2.1	2.1	2.1	54	51	52.5	102	101	101.5	22.25	25.75	24	25.25	33.5	29.375	1.2925	1.6275	1.46	51.1881
DP527-083	75	78	76.5	101	114	107.5	27	28	27.5	30	35.5	32.75	1.1275	1.5025	1.315	37.58	42.32	39.95	18	19.2	18.6	3.3	3.4	3.4	7.5	7.8	7.7	1.5	1.5	1.5	2.3	2.3	2.3	61	60	60.5	93	98	95.5	25	25.25	25.125	27	27.5	27.25	0.775	1.2	0.9875	28.7037
DP527-084	68	62	65	153	112	132.5	27.75	25.5	26.625	42.5	40	41.25	1.9675	1.8525	1.91	46.29	46.31	46.3	18.8	20.8	19.8	3.4	3.5	3.4	7.8	8.4	8.1	1.5	1.6	1.6	2.3	2.4	2.4	62	54	58	122	132	127	21.75	25	23.375	29	37.75	33.375	1.2275	1.81	1.51875	42.3276
DP527-085	73	70	71.5	156	138	147	21.75	21.25	21.5	30.25	31	30.625	1.475	1.595	1.535	48.76	51.45	50.11	20.6	21.7	21.1	3.4	3.7	3.5	8.7	8.5	8.6	1.7	1.6	1.6	2.6	2.3	2.5	56	53	54.5	95	89	92	16	16	16	18.75	23	20.875	0.9025	1.155	1.02875	48.1333
DP527-086	93	76	84.5	97	95	96	20.25	20.5	20.375	7.5	6.25	6.875	0.35	0.2275	0.28875	46.67	36.4	41.53	21.3	18.2	19.8	3.5	3.1	3.3	8.9	8.4	8.7	1.7	1.7	1.7	2.6	2.7	2.6	65	68	66.5	82	73	77.5	17.5	18.75	18.125	1.5	1.5	1.5	0.0575	0.0675	0.0625	38.3333
DP527-087	NA	76	76	130	136	133	24.75	28.5	26.625	9.75	11.75	10.75	0.3575	0.5525	0.455	36.67	47.02	41.84	20.8	23.3	22	3.5	3.9	3.7	8.4	8.5	8.5	1.6	1.5	1.6	2.4	2.2	2.3	70	61	65.5	78	121	99.5	24.3333	25.25	24.7917	0.666667	19	9.83333	0.01	0.9125	0.46125	15
DP527-088	71	70	70.5	154	132	143	24.25	24.75	24.5	41.5	41.25	41.375	2.325	2.2825	2.30375	56.02	55.33	55.68	22.7	22.4	22.6	3.5	3.5	3.5	9.2	9.1	9.1	1.7	1.6	1.7	2.6	2.6	2.6	56	50	53	119	110	114.5	20	21.25	20.625	30.25	32.25	31.25	1.2325	1.3975	1.315	40.7438
DP527-089	75	81	78	156	150	153	28	27.25	27.625	44.5	44.5	44.5	2.265	1.935	2.1	50.9	43.48	47.19	21.5	20.3	20.9	3.4	3.3	3.4	8.9	8.7	8.8	1.7	1.7	1.7	2.6	2.7	2.7	72	73	72.5	131	134	132.5	25.25	25.6667	25.4583	38.75	34	36.375	1.5325	1.27667	1.40458	39.5484
DP527-090	61	63	62	117	126	121.5	23	25.75	24.375	22.75	30	26.375	1.02	1.26	1.14	44.84	42	43.42	19.5	17.6	18.6	3.4	3.3	3.3	7.9	7.5	7.7	1.5	1.5	1.5	2.3	2.3	2.3	57	56	56.5	70	116	93	17.75	20.75	19.25	15.75	31	23.375	0.4625	1.3075	0.885	29.3651
DP527-091	63	65	64	125	120	122.5	25.5	24.5	25	42.25	41.75	42	2.3325	2.585	2.45875	55.21	61.92	58.56	22.5	23.5	23	3.6	3.7	3.7	8.9	9.1	9	1.6	1.6	1.6	2.5	2.4	2.5	54	47	50.5	82	88	85	20	19	19.5	21.5	29	25.25	0.7725	1.5475	1.16	35.9302
DP527-092	96	82	89	140	144	142	25.5	24.75	25.125	27.25	39.75	33.5	0.9175	1.6075	1.2625	33.67	40.44	37.05	16.7	18.2	17.4	3.2	3.4	3.3	7.4	7.7	7.5	1.5	1.5	1.5	2.3	2.3	2.3	58	53	55.5	121	126	123.5	20	21.5	20.75	25.25	25.75	25.5	1.0725	1.0625	1.0675	42.4752
DP527-093	63	69	66	121	141	131	30.5	32.25	31.375	46.25	49.75	48	2.32	2.4675	2.39375	50.16	49.6	49.88	20.1	19.6	19.9	3.5	3.5	3.5	8	7.8	7.9	1.5	1.5	1.5	2.3	2.2	2.3	62	75	68.5	108	115	111.5	21.25	26.3333	23.7917	19.25	42.6667	30.9583	0.875	1.55667	1.21583	45.4545
DP527-094	73	81	77	142	123	132.5	27.75	27.25	27.5	48	41.5	44.75	2.2525	1.4425	1.8475	46.93	34.76	40.84	20.3	17.8	19.1	3.4	3.2	3.3	8.3	8.1	8.2	1.6	1.7	1.6	2.5	2.6	2.5	60	62	61	101	114	107.5	24	20.5	22.25	31.5	32.5	32	1.1875	1.465	1.32625	37.6984
DP527-095	63	64	63.5	152	151	151.5	23.5	25.75	24.625	25.25	37.25	31.25	1.4575	2.1	1.77875	57.72	56.38	57.05	23.2	22.2	22.7	3.7	3.6	3.7	9	8.8	8.9	1.6	1.6	1.6	2.4	2.5	2.4	49	53	51	116	100	108	19.25	16.6667	17.9583	26.75	17.6667	22.2083	1.4225	0.826667	1.12458	53.1776
DP527-096	NA	84	84	121	111	116	25.5	27	26.25	10.25	42	26.125	0.34	1.58	0.96	33.17	37.62	35.39	17.2	19.1	18.1	3.3	3.3	3.3	7.5	8.4	7.9	1.5	1.7	1.6	2.3	2.6	2.4	86	82	84	85	107	96	26.5	25.25	25.875	15.5	27.75	21.625	0.215	1.1025	0.65875	13.871
DP527-097	91	92	91.5	142	154	148	29	29	29	43	36.5	39.75	0.94	0.8225	0.88125	21.86	22.53	22.2	15	14.6	14.8	2.9	2.9	2.9	7.4	7.2	7.3	1.7	1.6	1.7	2.6	2.5	2.5	68	71	69.5	133	122	127.5	23.5	25	24.25	35.25	23.5	29.375	1.57	1.09	1.33	44.539
DP527-098	75	85	80	124	118	121	33.5	32.75	33.125	36.75	21.5	29.125	1.645	0.7375	1.19125	44.76	34.3	39.53	20.2	18.5	19.4	3.5	3.3	3.4	8.1	7.8	7.9	1.5	1.5	1.5	2.4	2.4	2.4	59	70	64.5	87	101	94	23.75	24.25	24	22.75	8	15.375	1.105	0.3475	0.72625	48.5714
DP527-099	69	75	72	124	123	123.5	23.5	25	24.25	38.5	40.25	39.375	2.14	1.9875	2.06375	55.58	49.38	52.48	21.2	20.1	20.7	3.7	3.6	3.6	8	7.8	7.9	1.5	1.5	1.5	2.2	2.2	2.2	49	60	54.5	65	106	85.5	17.75	21	19.375	26.75	31	28.875	0.8675	1.3675	1.1175	32.4299
DP527-100	63	63	63	143	103	123	26.25	24.75	25.5	27.75	34	30.875	1.6175	1.925	1.77125	58.29	56.62	57.45	23.2	23.2	23.2	3.7	3.7	3.7	8.6	8.5	8.6	1.5	1.5	1.5	2.3	2.3	2.3	50	46	48	103	95	99	21.25	20.3333	20.7917	14	19.3333	16.6667	0.5425	0.896667	0.719583	38.75
DP527-101	61	72	66.5	129	129	129	25.25	26.75	26	34.25	34.5	34.375	1.8675	1.815	1.84125	54.53	52.61	53.57	20.9	21.1	21	3.6	3.6	3.6	8.1	8.2	8.1	1.5	1.5	1.5	2.2	2.3	2.3	48	47	47.5	107	78	92.5	22.5	19.25	20.875	29.25	14.5	21.875	1.385	0.61	0.9975	47.3504
DP527-102	65	61	63	105	109	107	26.5	26	26.25	39.25	36.25	37.75	2.0225	2.1025	2.0625	51.53	58	54.76	20.9	23.3	22.1	3.4	3.7	3.5	8.6	9	8.8	1.6	1.6	1.6	2.5	2.5	2.5	54	44	49	73	81	77	20.25	22.25	21.25	18	26.75	22.375	0.46	1.315	0.8875	25.5556
DP527-103	65	65	65	142	142	142	28.75	26.75	27.75	44	34.75	39.375	2.5125	1.855	2.18375	57.1	53.38	55.24	22.1	22.5	22.3	3.6	3.7	3.7	8.4	8.4	8.4	1.5	1.5	1.5	2.3	2.3	2.3	58	56	57	113	138	125.5	22.25	23.75	23	27.75	27.5	27.625	0.7	1.155	0.9275	25.2252
DP527-104	62	77	69.5	120	143	131.5	26.5	24.75	25.625	46.5	39	42.75	2.55	1.6325	2.09125	54.84	41.86	48.35	22.8	18.6	20.7	3.7	3.3	3.5	8.8	8.1	8.4	1.6	1.6	1.6	2.4	2.5	2.5	49	46	47.5	116	121	118.5	21.75	21	21.375	32.5	36.25	34.375	1.4	1.9675	1.68375	43.0769
DP527-105	67	61	64	156	133	144.5	25.25	22.25	23.75	37.75	35.25	36.5	1.9625	1.97	1.96625	51.99	55.89	53.94	20.7	21.6	21.1	3.5	3.6	3.6	8.3	8.4	8.3	1.5	1.5	1.5	2.3	2.3	2.3	68	48	58	90	112	101	15.6667	21	18.3333	10.3333	29.5	19.9167	0.276667	1.3625	0.819583	26.7742
DP527-106	74	78	76	101	102	101.5	26.5	24.5	25.5	43.5	37.5	40.5	1.7675	1.155	1.46125	40.63	30.8	35.72	19.2	15.7	17.5	3.4	3.1	3.2	8.1	7.4	7.7	1.6	1.6	1.6	2.4	2.4	2.4	70	60	65	72	83	77.5	22	16.75	19.375	25.5	19.75	22.625	0.5075	0.6275	0.5675	19.902
DP527-107	76	76	76	128	128	128	27.75	26.75	27.25	44	38.75	41.375	1.8275	1.2225	1.525	41.53	31.55	36.54	18.5	15.4	17	3.4	3	3.2	7.8	7.2	7.5	1.5	1.6	1.5	2.3	2.4	2.4	62	88	75	111	114	112.5	24.5	21.5	23	28	25.5	26.75	1.235	0.6575	0.94625	44.1071
DP527-108	58	53	55.5	104	114	109	20.25	23	21.625	37.5	44	40.75	1.945	2.23	2.0875	51.87	50.68	51.27	20.6	20.2	20.4	3.6	3.4	3.5	8	8.2	8.1	1.5	1.5	1.5	2.3	2.4	2.3	48	49	48.5	88	101	94.5	20.5	20.25	20.375	31.5	33.5	32.5	1.4575	1.5125	1.485	46.2698
DP527-109	71	72	71.5	98	89	93.5	24.5	22.25	23.375	37.75	25	31.375	1.4875	0.99	1.23875	39.4	39.6	39.5	17.8	17.2	17.5	3.4	3.4	3.4	7.5	7	7.3	1.5	1.4	1.5	2.2	2.1	2.2	58	58	58	76	65	70.5	20.5	23.5	22	22.25	20	21.125	0.985	0.86	0.9225	44.2697
DP527-110	62	69	65.5	140	133	136.5	29.5	26.75	28.125	40	40.25	40.125	1.705	1.935	1.82	42.63	48.07	45.35	19.1	20.9	20	3.1	3.2	3.1	8.5	8.8	8.6	1.7	1.7	1.7	2.8	2.7	2.8	46	56	51	101	90	95.5	20.3333	18.75	19.5417	26	16.5	21.25	1.10667	0.5275	0.817083	42.5641
DP527-111	68	62	65	138	113	125.5	27.25	27	27.125	33.5	28.75	31.125	1.8275	1.6775	1.7525	54.55	58.35	56.45	20.9	22.5	21.7	3.6	3.8	3.7	8.1	8.3	8.2	1.5	1.5	1.5	2.3	2.2	2.2	55	52	53.5	93	81	87	20.5	21.25	20.875	11	18	14.5	0.4175	0.7725	0.595	37.9545
DP527-112	84	82	83	160	170	165	28.25	28.25	28.25	39.5	44.5	42	1.8975	1.9175	1.9075	48.04	43.09	45.56	21	19.7	20.3	3.3	3.2	3.3	8.9	8.7	8.8	1.7	1.7	1.7	2.7	2.7	2.7	67	78	72.5	132	143	137.5	22.75	22	22.375	28.75	29.75	29.25	1.39	1.4	1.395	48.3478
DP527-113	73	60	66.5	178	135	156.5	30.25	27	28.625	44.25	37	40.625	2.25	2.135	2.1925	50.85	57.7	54.28	19.9	22.9	21.4	3.4	3.6	3.5	8.2	8.9	8.5	1.6	1.6	1.6	2.4	2.5	2.4	46	69	57.5	116	125	120.5	19.25	24.5	21.875	19.5	26.5	23	0.805	0.795	0.8	41.2821
DP527-114	63	63	63	105	127	116	24.75	24.75	24.75	31.25	33.25	32.25	1.8725	2.0225	1.9475	59.92	60.83	60.37	23.5	24.4	23.9	3.8	3.8	3.8	8.9	9.1	9	1.6	1.6	1.6	2.4	2.4	2.4	64	66	65	88	85	86.5	23.75	25.25	24.5	33.75	13.5	23.625	1.2925	0.68	0.98625	38.2963
DP527-115	75	68	71.5	130	116	123	24	24.5	24.25	35.25	26.25	30.75	1.9025	1.5875	1.745	53.97	60.48	57.22	21.8	24.4	23.1	3.9	4.1	4	8	8.5	8.3	1.4	1.5	1.5	2.1	2.1	2.1	60	62	61	108	121	114.5	17.3333	20.75	19.0417	15	14.25	14.625	0.663333	0.6025	0.632917	44.2222
DP527-116	75	68	71.5	119	127	123	25	26.5	25.75	44.5	43.75	44.125	1.95	2.5525	2.25125	43.82	58.34	51.08	17.9	21.3	19.6	3.4	3.7	3.6	7.4	7.8	7.6	1.5	1.4	1.4	2.2	2.1	2.1	58	45	51.5	112	77	94.5	21	18.25	19.625	29	23	26	1.27	0.795	1.0325	43.7931
DP527-117	69	62	65.5	141	141	141	28	24.5	26.25	43.75	37.75	40.75	2.13	1.7075	1.91875	48.69	45.23	46.96	18.8	18	18.4	3.5	3.4	3.5	7.7	7.5	7.6	1.5	1.5	1.5	2.2	2.2	2.2	52	52	52	80	111	95.5	18.75	18.6667	18.7083	16.5	22.6667	19.5833	0.6025	0.76	0.68125	36.5152
DP527-118	60	60	60	120	121	120.5	23	24.75	23.875	3.5	NA	3.5	0.1775	NA	0.1775	50.71	NA	50.71	21	NA	21	3.5	NA	3.5	8	NA	8	1.5	NA	1.5	2.3	NA	2.3	47	49	48	90	119	104.5	20.5	22.75	21.625	24.75	32.25	28.5	1.0275	1.5225	1.275	41.5152
DP527-119	62	66	64	120	145	132.5	24.25	24	24.125	33.5	31	32.25	1.5775	1.535	1.55625	47.09	49.52	48.3	19.9	20.2	20.1	3.6	3.6	3.6	7.9	8.1	8	1.5	1.5	1.5	2.2	2.3	2.3	58	58	58	113	79	96	17.75	14	15.875	26.5	12.25	19.375	1.2875	0.415	0.85125	48.5849
DP527-120	70	62	66	133	149	141	23.5	26.5	25	31.75	36.5	34.125	1.6875	1.9375	1.8125	53.15	53.08	53.12	20.8	20.9	20.9	3.7	3.6	3.7	8	8.2	8.1	1.5	1.5	1.5	2.2	2.3	2.2	58	51	54.5	121	90	105.5	21	19.5	20.25	11.75	9.5	10.625	0.44	0.3125	0.37625	37.4468
DP527-121	58	57	57.5	120	131	125.5	24.75	23.5	24.125	39.5	38.5	39	1.6575	1.8525	1.755	41.96	48.12	45.04	20.1	21.8	20.9	3.3	3.4	3.3	8.7	9.1	8.9	1.7	1.7	1.7	2.7	2.7	2.7	48	49	48.5	94	115	104.5	18	21.25	19.625	26.75	32	29.375	1.155	1.48	1.3175	43.1776
DP527-122	72	66	69	124	105	114.5	24.25	22.5	23.375	35.25	30.5	32.875	1.755	1.0775	1.41625	49.79	35.33	42.56	20.5	18.3	19.4	3.7	3.3	3.5	7.9	7.8	7.8	1.5	1.6	1.5	2.1	2.4	2.3	52	52	52	84	111	97.5	22.5	25.75	24.125	18.5	33	25.75	0.8525	1.6475	1.25	46.0811
DP527-123	64	63	63.5	124	129	126.5	25.75	25.5	25.625	42	38	40	2.39	2.2625	2.32625	56.9	59.54	58.22	23.3	23.6	23.5	3.5	3.5	3.5	9.4	9.3	9.4	1.7	1.7	1.7	2.7	2.7	2.7	48	48	48	71	91	81	17.5	22.25	19.875	16.5	32.5	24.5	0.6375	1.52	1.07875	38.6364
DP527-124	70	70	70	150	155	152.5	25.25	25.25	25.25	39.25	36.25	37.75	2.49	2.1775	2.33375	63.44	60.07	61.75	23.4	22.8	23.1	3.7	3.7	3.7	9.2	8.9	9.1	1.6	1.6	1.6	2.5	2.4	2.5	46	55	50.5	111	135	123	20.75	21	20.875	28.5	22.75	25.625	1.6775	1.3525	1.515	58.8596
DP527-125	68	76	72	162	165	163.5	28.5	27.25	27.875	45	46.5	45.75	2.375	2.7075	2.54125	52.78	58.23	55.5	20.9	22.6	21.7	3.5	3.7	3.6	8.3	8.7	8.5	1.5	1.6	1.6	2.4	2.4	2.4	49	65	57	120	139	129.5	23.5	23.5	23.5	31	30	30.5	1.26	1.44	1.35	40.6452
DP527-126	63	61	62	91	113	102	19.5	22.5	21	26	33.25	29.625	1.43	1.9075	1.66875	55	57.37	56.18	21.7	22	21.9	3.9	3.8	3.8	8.2	8.5	8.3	1.5	1.5	1.5	2.1	2.2	2.2	48	46	47	78	80	79	16.75	18.25	17.5	19.5	25.75	22.625	0.9175	1.3375	1.1275	47.0513
DP527-127	78	94	86	108	95	101.5	25.75	28	26.875	32.25	0.5	16.375	0.92	NA	0.92	28.53	NA	28.53	15.1	1.7	8.4	3	0.9	1.9	7.1	2.6	4.9	1.6	1.8	1.7	2.4	3	2.7	52	44	48	91	84	87.5	22.75	21.25	22	31	26.75	28.875	1.2575	1.1825	1.22	40.5645
DP527-128	78	73	75.5	121	123	122	28	27.5	27.75	35	40	37.5	1.145	2.4225	1.78375	32.71	60.56	46.64	17.9	23.4	20.6	3.1	3.6	3.4	8	8.9	8.5	1.7	1.6	1.6	2.6	2.5	2.5	58	64	61	90	83	86.5	21	24	22.5	24.25	27.75	26	1.275	1.2425	1.25875	52.5773
DP527-129	65	70	67.5	95	105	100	26.75	27	26.875	40	42	41	1.595	2.08	1.8375	39.88	49.52	44.7	16.8	19	17.9	3.3	3.5	3.4	7.2	7.6	7.4	1.5	1.5	1.5	2.2	2.2	2.2	60	52	56	61	81	71	19	21	20	26	35.5	30.75	0.68	1.65	1.165	26.1538
DP527-130	75	75	75	111	102	106.5	17.25	15	16.125	28.75	18.25	23.5	1.6575	0.8775	1.2675	57.65	48.08	52.87	23.1	23.5	23.3	3.7	3.6	3.6	9	9.1	9.1	1.6	1.6	1.6	2.5	2.6	2.5	49	49	49	82	91	86.5	16	16.25	16.125	15.3333	19	17.1667	0.526667	0.8075	0.667083	34.3478
DP527-131	70	70	70	103	135	119	24.25	27.5	25.875	23	25	24	1.16	1.02	1.09	50.43	40.8	45.62	22.1	19.8	21	3.8	3.4	3.6	8.6	8.4	8.5	1.6	1.6	1.6	2.3	2.4	2.4	48	53	50.5	99	78	88.5	19.5	17.25	18.375	12.75	9.5	11.125	0.56	0.3975	0.47875	43.9216
DP527-132	67	61	64	149	146	147.5	25	24	24.5	38.5	37.5	38	2.0025	2.21	2.10625	52.01	58.93	55.47	21	22.6	21.8	3.6	3.7	3.7	8.3	8.6	8.4	1.5	1.5	1.5	2.3	2.3	2.3	49	51	50	108	130	119	19	21	20	31.75	34.25	33	1.6	1.7575	1.67875	50.3937
DP527-133	63	60	61.5	141	146	143.5	22.75	23.25	23	35.5	35	35.25	1.6475	1.9225	1.785	46.41	54.93	50.67	19.3	20.8	20.1	3.5	3.7	3.6	7.9	8.1	8	1.5	1.5	1.5	2.3	2.2	2.3	52	54	53	126	119	122.5	17.75	16.5	17.125	17	14	15.5	0.7475	0.5225	0.635	43.9706
DP527-134	68	65	66.5	118	103	110.5	22.25	21.25	21.75	28.5	29.5	29	1.28	1.36	1.32	44.91	46.1	45.51	21.1	22.8	22	3.7	3.8	3.7	8.1	8.6	8.4	1.5	1.5	1.5	2.2	2.3	2.3	52	47	49.5	97	83	90	19.75	18.75	19.25	29.75	28.25	29	1.1825	1.0175	1.1	39.7479
DP527-135	81	69	75	105	114	109.5	17.25	18.25	17.75	25.5	24.75	25.125	0.885	1.225	1.055	34.71	49.49	42.1	18.5	20.5	19.5	3.1	3.4	3.2	8.7	8.6	8.7	1.8	1.6	1.7	2.9	2.6	2.7	NA	58	58	NA	110	110	NA	23.75	23.75	NA	33.75	33.75	NA	1.3275	1.3275	NA
DP527-136	60	63	61.5	105	110	107.5	21.25	21.75	21.5	36	36.75	36.375	2.0475	1.95	1.99875	56.88	53.06	54.97	23.7	23.1	23.4	3.8	3.6	3.7	8.8	9	8.9	1.5	1.6	1.6	2.4	2.5	2.4	46	50	48	97	82	89.5	19	19.5	19.25	26	25.25	25.625	1.23	1.29	1.26	47.3077
DP527-137	58	56	57	121	134	127.5	22.5	23.25	22.875	38	49.5	43.75	1.52	2.475	1.9975	40	50	45	17.9	20.5	19.2	3.1	3.4	3.3	8.1	8.5	8.3	1.7	1.6	1.6	2.6	2.5	2.6	46	58	52	100	121	110.5	19.75	22.25	21	32.25	36.25	34.25	1.1575	1.78	1.46875	35.8915
DP527-138	60	66	63	111	124	117.5	26.75	27.5	27.125	41	40	40.5	2.0325	2.0525	2.0425	49.57	51.31	50.44	21.6	21.7	21.6	3.5	3.4	3.5	8.8	9	8.9	1.6	1.7	1.6	2.5	2.7	2.6	49	41	45	103	NA	103	21.75	19.75	20.75	28	21.25	24.625	1.2675	0.9425	1.105	45.2679
DP527-139	68	66	67	135	135	135	25.5	24.5	25	41.75	43.25	42.5	2.38	2.6075	2.49375	57.01	60.29	58.65	22.7	23	22.8	3.7	3.8	3.8	8.6	8.6	8.6	1.5	1.5	1.5	2.3	2.3	2.3	58	50	54	100	91	95.5	22	18.75	20.375	27.5	27	27.25	1.155	1.34	1.2475	42
DP527-140	67	75	71	131	136	133.5	22.5	22	22.25	36	24.25	30.125	1.8825	1.27	1.57625	52.29	52.37	52.33	21.2	21.6	21.4	3.6	3.7	3.6	8.6	8.7	8.7	1.6	1.6	1.6	2.4	2.4	2.4	58	66	62	123	114	118.5	21.75	20.75	21.25	36	22	29	1.6975	0.965	1.33125	47.1528
DP527-141	61	61	61	110	111	110.5	26.75	26	26.375	38.25	34.5	36.375	1.9575	1.6	1.77875	51.18	46.38	48.78	21.6	20	20.8	3.5	3.4	3.5	9	8.6	8.8	1.7	1.6	1.7	2.6	2.5	2.5	47	51	49	91	41	66	19.5	13	16.25	21.5	NA	21.5	1.0975	NA	1.0975	51.0465
DP527-142	54	58	56	116	131	123.5	21.25	19.5	20.375	37	38.5	37.75	1.935	1.8525	1.89375	52.3	48.12	50.21	20.9	20.3	20.6	3.5	3.6	3.6	8.2	7.8	8	1.5	1.5	1.5	2.3	2.2	2.3	65	54	59.5	72	115	93.5	15.5	19	17.25	20.5	26	23.25	0.5575	1.0525	0.805	27.1951
DP527-143	58	60	59	117	119	118	23.5	25.75	24.625	37.5	41.75	39.625	2.1525	2.21	2.18125	57.4	52.93	55.17	22.5	21.9	22.2	3.8	3.9	3.8	8.4	8.2	8.3	1.5	1.5	1.5	2.2	2.1	2.2	48	46	47	37	84	60.5	16	21.25	18.625	NA	25.75	25.75	NA	1.18	1.18	NA
DP527-144	60	59	59.5	113	126	119.5	22.75	22.5	22.625	38.75	37.75	38.25	2.415	2.1675	2.29125	62.32	57.42	59.87	24.6	23.6	24.1	3.7	3.6	3.6	9.6	9.2	9.4	1.7	1.6	1.7	2.6	2.6	2.6	48	77	62.5	124	96	110	21.75	20.5	21.125	31.25	22.25	26.75	1.59	0.33	0.96	50.88
DP527-145	59	60	59.5	97	94	95.5	22.5	19.75	21.125	32.75	30.25	31.5	1.545	1.4625	1.50375	47.18	48.35	47.76	19.8	20.4	20.1	3.5	3.6	3.5	8.1	8	8	1.5	1.5	1.5	2.3	2.2	2.3	47	45	46	76	78	77	18.5	16.6667	17.5833	24.25	21	22.625	1.1225	0.903333	1.01292	46.2887
DP527-146	65	71	68	118	117	117.5	26.25	26	26.125	39.25	44.75	42	1.79	1.9475	1.86875	45.61	43.52	44.56	18.3	18.1	18.2	3.3	3.3	3.3	7.9	7.8	7.8	1.6	1.5	1.6	2.4	2.4	2.4	61	54	57.5	98	98	98	20	20.25	20.125	31.25	31	31.125	1.44	1.315	1.3775	46.08
DP527-147	58	60	59	123	121	122	23.5	21	22.25	39.5	34.5	37	2.1625	1.835	1.99875	54.75	53.19	53.97	23.3	23.5	23.4	3.6	3.6	3.6	9.2	9.2	9.2	1.6	1.6	1.6	2.6	2.6	2.6	38	40	39	79	102	90.5	18.3333	17.5	17.9167	18.6667	22.5	20.5833	0.966667	1.1275	1.04708	51.7857
DP527-148	63	55	59	126	111	118.5	19.5	24.5	22	26.25	43.5	34.875	0.7125	2.555	1.63375	27.14	58.74	42.94	15.5	22.9	19.2	2.8	3.5	3.2	7.9	9	8.4	1.8	1.6	1.7	2.9	2.5	2.7	43	46	44.5	93	97	95	17.25	17	17.125	26.25	23.5	24.875	1.2175	0.97	1.09375	46.381
DP527-149	64	56	60	129	119	124	23.25	22	22.625	32.25	34.5	33.375	1.855	1.8	1.8275	57.52	52.17	54.85	22.6	21.1	21.8	3.6	3.5	3.5	8.9	8.6	8.8	1.6	1.6	1.6	2.5	2.5	2.5	52	46	49	121	100	110.5	22.5	21.75	22.125	24.25	16.5	20.375	1.205	0.8775	1.04125	49.6907
DP527-150	73	77	75	135	158	146.5	27	27.25	27.125	33.5	32.75	33.125	1.7625	1.7925	1.7775	52.61	54.73	53.67	22.6	22.5	22.5	3.6	3.6	3.6	8.9	8.9	8.9	1.6	1.6	1.6	2.5	2.5	2.5	74	59	66.5	132	137	134.5	22.75	25.5	24.125	27.75	34.25	31	1.395	1.6025	1.49875	50.2703
DP527-151	73	79	76	156	123	139.5	27.5	24.75	26.125	50.5	38	44.25	2.675	1.435	2.055	52.97	37.76	45.37	20.6	17.9	19.3	3.6	3.2	3.4	8	8	8	1.5	1.6	1.6	2.3	2.5	2.4	62	61	61.5	87	92	89.5	19.25	19.75	19.5	26.75	30.75	28.75	0.715	1.0475	0.88125	26.729
DP527-152	93	NA	93	98	NA	98	17	NA	17	25.5	NA	25.5	0.8825	NA	0.8825	34.61	NA	34.61	18.7	NA	18.7	3.4	NA	3.4	7.9	NA	7.9	1.6	NA	1.6	2.3	NA	2.3	51	48	49.5	71	83	77	16.25	16.75	16.5	20	20.25	20.125	0.86	0.93	0.895	43
DP527-153	62	64	63	116	127	121.5	25.75	25.75	25.75	40.75	40	40.375	1.8375	1.9	1.86875	45.09	47.5	46.3	19.2	19.9	19.6	3.4	3.6	3.5	8.1	8.2	8.1	1.6	1.6	1.6	2.4	2.3	2.3	52	53	52.5	95	101	98	21.75	22.75	22.25	28.75	30.25	29.5	0.9125	1.0075	0.96	31.7391
DP527-154	61	60	60.5	106	122	114	26	24.25	25.125	33	38.5	35.75	1.3	2.1675	1.73375	39.39	56.3	47.85	17.4	21.3	19.4	3.1	3.5	3.3	7.9	8.7	8.3	1.7	1.6	1.6	2.6	2.5	2.5	48	46	47	82	75	78.5	19	20.75	19.875	22.5	26.75	24.625	0.8725	0.8975	0.885	38.7778
DP527-155	57	66	61.5	108	158	133	19.5	21.75	20.625	15.25	34.5	24.875	0.8375	2.0425	1.44	54.92	59.2	57.06	23.6	25	24.3	3.5	3.7	3.6	9.4	9.9	9.7	1.7	1.7	1.7	2.7	2.7	2.7	62	51	56.5	114	70	92	20	16	18	25	18	21.5	1.3025	0.4975	0.9	52.1
DP527-156	63	65	64	133	143	138	26.75	28.25	27.5	41	41	41	2.26	2.2875	2.27375	55.12	55.79	55.46	21.4	21.7	21.6	3.7	3.7	3.7	8.1	8.1	8.1	1.5	1.5	1.5	2.2	2.2	2.2	54	54	54	113	106	109.5	25.3333	21	23.1667	28.3333	22.5	25.4167	1.21333	0.95	1.08167	42.8235
DP527-157	66	69	67.5	148	125	136.5	24.75	22.25	23.5	49.25	37.75	43.5	2.6725	2.1025	2.3875	54.26	55.7	54.98	20.5	21.7	21.1	3.6	3.6	3.6	8	8.3	8.2	1.5	1.5	1.5	2.2	2.3	2.3	72	52	62	100	122	111	16.75	19.75	18.25	24	38.75	31.375	0.955	1.865	1.41	39.7917
DP527-158	68	60	64	118	117	117.5	21	23.75	22.375	34.5	38.25	36.375	2.21	1.685	1.9475	64.06	44.05	54.06	25.1	19.8	22.5	3.8	3.4	3.6	9.3	8.4	8.8	1.6	1.6	1.6	2.4	2.5	2.5	52	53	52.5	95	104	99.5	16.25	18.5	17.375	24.25	26.5	25.375	1.135	1.17	1.1525	46.8041
DP527-159	63	70	66.5	114	125	119.5	22.25	23.5	22.875	30	37.75	33.875	1.3725	1.9125	1.6425	45.75	50.66	48.21	19.2	19.7	19.5	3.4	3.5	3.5	8	8	8	1.6	1.5	1.5	2.4	2.3	2.3	60	70	65	89	87	88	18.75	19.5	19.125	26	19.25	22.625	1.1675	0.665	0.91625	44.9038
DP527-160	65	62	63.5	127	128	127.5	20.5	22	21.25	31	34.75	32.875	1.46	1.84	1.65	47.1	52.95	50.02	19.9	22.1	21	3.4	3.5	3.5	8.3	8.9	8.6	1.6	1.6	1.6	2.5	2.5	2.5	51	58	54.5	105	116	110.5	19.75	21.25	20.5	26.25	26.75	26.5	1.085	1.11	1.0975	41.3333
DP527-161	64	69	66.5	107	105	106	26	24.25	25.125	40.25	33	36.625	2.365	1.59	1.9775	58.76	48.18	53.47	22.7	20.3	21.5	3.6	3.4	3.5	8.6	8.4	8.5	1.5	1.6	1.6	2.4	2.5	2.4	49	58	53.5	86	86	86	22.25	22	22.125	29	45	37	1.3925	2.01667	1.70458	48.0172
DP527-162	68	80	74	154	131	142.5	24.5	24.25	24.375	38.5	35.5	37	1.92	1.3125	1.61625	49.87	36.97	43.42	19.9	17.2	18.6	3.5	3.1	3.3	8	7.7	7.9	1.5	1.6	1.6	2.3	2.5	2.4	44	48	46	113	134	123.5	18.75	21	19.875	28	30.5	29.25	1.37	1.3075	1.33875	48.9286
DP527-163	57	57	57	137	123	130	17.75	18.75	18.25	30.25	34.75	32.5	1.7825	1.7975	1.79	58.93	51.73	55.33	22.2	20.7	21.4	3.7	3.5	3.6	8.4	8.2	8.3	1.5	1.5	1.5	2.3	2.3	2.3	48	45	46.5	85	88	86.5	13.6667	15.25	14.4583	18.6667	20.75	19.7083	0.523333	0.9325	0.727917	28.0357
DP527-164	68	71	69.5	133	143	138	25.75	27.5	26.625	42.25	40.5	41.375	1.8875	1.94	1.91375	44.67	47.9	46.29	19.5	20.4	19.9	3.2	3.4	3.3	8.6	8.6	8.6	1.7	1.6	1.7	2.7	2.6	2.6	60	70	65	115	127	121	20.75	23.25	22	32	22.5	27.25	1.2175	0.4	0.80875	38.0469
DP527-165	62	60	61	101	120	110.5	23	24.25	23.625	33.5	39.25	36.375	1.37	2.03	1.7	40.9	51.72	46.31	18.6	20.4	19.5	3.3	3.6	3.5	8	8.2	8.1	1.6	1.5	1.5	2.4	2.3	2.4	43	51	47	70	68	69	21.25	23	22.125	29.5	13.6667	21.5833	1.3675	0.16	0.76375	46.3559
DP527-166	53	56	54.5	128	107	117.5	24.25	25.75	25	39.25	43	41.125	2.225	2.38	2.3025	56.69	55.35	56.02	23.2	22.9	23	3.5	3.5	3.5	9.2	9.1	9.2	1.7	1.6	1.6	2.6	2.6	2.6	46	49	47.5	95	100	97.5	21.25	22.3333	21.7917	22.25	27	24.625	0.965	1.17667	1.07083	43.3708
DP527-167	67	83	75	124	141	132.5	21	22.5	21.75	29.25	27.25	28.25	1.35	0.755	1.0525	46.15	27.71	36.93	21	16.6	18.8	3.7	3.2	3.4	8.3	7.6	7.9	1.5	1.6	1.6	2.3	2.4	2.4	56	56	56	109	130	119.5	19.5	20.25	19.875	16.25	19.25	17.75	0.5725	0.7425	0.6575	35.2308
DP527-168	70	76	73	93	110	101.5	20.25	19.75	20	23.75	16.25	20	1.1125	0.8875	1	46.84	54.62	50.73	19.7	23	21.4	3.5	3.9	3.7	7.7	8.4	8	1.5	1.5	1.5	2.2	2.2	2.2	58	56	57	78	82	80	18.25	19.25	18.75	19.5	18.75	19.125	0.755	0.7775	0.76625	38.7179
DP527-169	67	65	66	108	104	106	22	23.25	22.625	35.25	35.5	35.375	1.445	1.36	1.4025	40.99	38.31	39.65	19.1	17.7	18.4	3.4	3.3	3.4	8	7.5	7.7	1.6	1.5	1.5	2.4	2.3	2.3	46	47	46.5	72	73	72.5	18.25	19	18.625	24.25	27.5	25.875	1.12	0.7975	0.95875	46.1856
DP527-170	62	62	62	116	110	113	24.5	24.25	24.375	39.25	39.5	39.375	2.3425	1.605	1.97375	59.68	40.63	50.16	23.9	19.7	21.8	3.8	3.4	3.6	9.1	8.5	8.8	1.6	1.7	1.6	2.4	2.5	2.5	53	51	52	67	70	68.5	18.5	19.5	19	24.75	24	24.375	0.885	0.8575	0.87125	35.7576
DP527-171	60	58	59	110	101	105.5	21.75	20.25	21	34.75	32.75	33.75	1.5	1.335	1.4175	43.17	40.76	41.96	21.8	20.2	21	3.4	3.3	3.4	9.1	8.6	8.9	1.7	1.7	1.7	2.7	2.7	2.7	46	46	46	77	66	71.5	17	15.5	16.25	21.75	13.25	17.5	0.7425	0.49	0.61625	34.1379
DP527-172	63	65	64	99	116	107.5	24	23.5	23.75	37.25	39.5	38.375	1.505	1.755	1.63	40.4	44.43	42.42	18.4	19.9	19.1	3.3	3.5	3.4	7.8	8.1	7.9	1.6	1.6	1.6	2.4	2.4	2.4	49	51	50	83	95	89	19.5	21.75	20.625	33.5	46	39.75	1.4475	1.945	1.69625	43.209
DP527-173	66	67	66.5	118	132	125	25.75	25	25.375	29.75	32.5	31.125	1.475	1.505	1.49	49.58	46.31	47.94	22.2	21.8	22	3.5	3.5	3.5	8.9	8.9	8.9	1.6	1.6	1.6	2.6	2.5	2.5	56	45	50.5	97	104	100.5	23.75	22.25	23	20	25.5	22.75	0.9275	1.1725	1.05	46.375
DP527-174	65	64	64.5	140	136	138	24.25	25.5	24.875	34.25	38.25	36.25	1.925	2.1225	2.02375	56.2	55.49	55.85	22	21.3	21.7	3.7	3.6	3.6	8.4	8.3	8.4	1.5	1.5	1.5	2.3	2.3	2.3	52	52	52	119	111	115	21	20.75	20.875	0.25	24	12.125	0.0075	1	0.50375	30
DP527-175	70	68	69	144	155	149.5	28.75	30.75	29.75	42.5	48.5	45.5	2.2575	2.6125	2.435	53.12	53.87	53.49	21.2	21.5	21.3	3.6	3.7	3.6	8.7	8.5	8.6	1.6	1.6	1.6	2.4	2.3	2.4	59	83	71	142	128	135	25	26.5	25.75	32.75	26.25	29.5	1.4875	1.05	1.26875	45.4198
DP527-176	59	64	61.5	112	111	111.5	22.5	23.75	23.125	41	43.25	42.125	2.5275	2.035	2.28125	61.65	47.05	54.35	24	20.5	22.3	3.6	3.3	3.5	9.3	8.7	9	1.6	1.7	1.6	2.6	2.6	2.6	52	54	53	70	110	90	15.75	20.75	18.25	13.75	32	22.875	0.54	1.795	1.1675	39.2727
DP527-177	NA	68	68	115	124	119.5	22.6667	26.5	24.5833	25.6667	40.75	33.2083	1.03667	2.3	1.66833	40.39	56.44	48.42	19.3	23.3	21.3	3.3	3.7	3.5	8.3	9	8.7	1.6	1.6	1.6	2.5	2.4	2.5	53	62	57.5	118	109	113.5	20	22.75	21.375	32	29.5	30.75	1.63	1.0575	1.34375	50.9375
DP527-178	67	62	64.5	136	123	129.5	26	25.75	25.875	40.5	41	40.75	1.835	1.9975	1.91625	45.31	48.72	47.01	19.3	20.2	19.7	3.3	3.4	3.3	8.1	8.3	8.2	1.6	1.6	1.6	2.5	2.5	2.5	52	64	58	102	93	97.5	21	21.25	21.125	29	26.5	27.75	1.22667	0.735	0.980833	42.2989
DP527-179	NA	NA	NA	NA	NA	NA	NA	NA	NA	NA	NA	NA	NA	NA	NA	NA	NA	NA	NA	NA	NA	NA	NA	NA	NA	NA	NA	NA	NA	NA	NA	NA	NA	NA	NA	NA	NA	NA	NA	NA	NA	NA	NA	NA	NA	NA	NA	NA	NA
DP527-180	71	74	72.5	141	134	137.5	26	27.25	26.625	34	34.25	34.125	1.97	1.8025	1.88625	57.94	52.63	55.28	22.2	20.7	21.4	3.6	3.5	3.5	8.6	8.2	8.4	1.5	1.5	1.5	2.4	2.3	2.4	70	54	62	111	114	112.5	22.25	23.5	22.875	13.25	18.25	15.75	0.5025	0.7925	0.6475	37.9245
DP527-181	60	60	60	125	127	126	24	25.5	24.75	37.75	38.75	38.25	1.9925	1.7925	1.8925	52.78	46.26	49.52	20.4	18.9	19.6	3.5	3.4	3.4	8	7.7	7.9	1.5	1.5	1.5	2.3	2.3	2.3	77	58	67.5	98	119	108.5	23	20.5	21.75	14.5	33.25	23.875	0.26	1.1725	0.71625	17.931
DP527-182	64	64	64	124	133	128.5	24.5	27.25	25.875	33.5	39.5	36.5	1.51	1.8275	1.66875	45.07	46.27	45.67	19	18.9	18.9	3.4	3.4	3.4	8	7.8	7.9	1.6	1.5	1.5	2.4	2.3	2.3	54	41	47.5	103	110	106.5	19.5	20.75	20.125	21.5	29.75	25.625	0.6425	1.28	0.96125	29.8837
DP527-183	61	67	64	135	135	135	25.25	27.75	26.5	43.75	47	45.375	2.035	2.3775	2.20625	46.51	50.59	48.55	20	21.2	20.6	3.3	3.5	3.4	8.6	8.6	8.6	1.7	1.6	1.6	2.6	2.5	2.5	46	58	52	110	101	105.5	22.25	19.3333	20.7917	40	27	33.5	1.9675	1.24333	1.60542	49.1875
DP527-184	74	75	74.5	102	112	107	28.25	25.5	26.875	23	20.5	21.75	1.14	0.7125	0.92625	49.57	34.76	42.16	20.9	17.5	19.2	3.5	3.2	3.4	8.6	7.7	8.2	1.6	1.6	1.6	2.5	2.4	2.5	54	62	58	96	83	89.5	22.75	25.25	24	23.75	12.5	18.125	1.195	0.5325	0.86375	50.3158
DP527-185	65	75	70	142	138	140	23.75	25.75	24.75	36.25	39.5	37.875	2.21	1.9325	2.07125	60.97	48.92	54.94	23.2	20.8	22	3.7	3.5	3.6	9	8.6	8.8	1.6	1.6	1.6	2.4	2.5	2.5	56	75	65.5	98	112	105	22	22.75	22.375	12	22.5	17.25	0.47	0.995	0.7325	39.1667
DP527-186	63	67	65	124	127	125.5	24.25	22.75	23.5	37.75	35.25	36.5	2.05	1.9	1.975	54.3	53.9	54.1	22.6	22.2	22.4	3.9	3.9	3.9	8.5	8.2	8.3	1.5	1.5	1.5	2.2	2.1	2.2	62	58	60	60	72	66	13	16	14.5	5	7	6	0.16	0.26	0.21	32
DP527-187	77	75	76	120	118	119	27.75	27.75	27.75	40	36	38	1.89	1.45	1.67	47.25	40.28	43.76	20	19.6	19.8	3.4	3.3	3.4	8.7	8.8	8.7	1.7	1.7	1.7	2.6	2.6	2.6	60	62	61	79	100	89.5	21	20.75	20.875	13	26.75	19.875	0.355	1.2125	0.78375	27.3077
DP527-188	74	65	69.5	134	126	130	25.25	25	25.125	41.75	43.5	42.625	2.4475	2.4425	2.445	58.62	56.15	57.39	23.2	22.6	22.9	3.7	3.6	3.7	8.9	8.8	8.9	1.6	1.6	1.6	2.4	2.4	2.4	52	60	56	104	105	104.5	21.75	20.5	21.125	32	34	33	1.855	2.0675	1.96125	57.9688
DP527-189	68	70	69	122	131	126.5	24.25	26.25	25.25	49.5	41.25	45.375	2.78	2.1375	2.45875	56.16	51.82	53.99	21.7	20.1	20.9	3.7	3.5	3.6	8	7.8	7.9	1.5	1.5	1.5	2.2	2.2	2.2	58	58	58	100	107	103.5	20.75	21.25	21	32.5	32.5	32.5	0.95	1.3675	1.15875	29.2308
DP527-190	65	73	69	128	125	126.5	26.5	26	26.25	34.75	31	32.875	2.0575	1.595	1.82625	59.21	51.45	55.33	23.4	21.8	22.6	3.7	3.7	3.7	8.9	8.5	8.7	1.6	1.5	1.5	2.4	2.3	2.4	56	62	59	117	132	124.5	24	25.5	24.75	28.25	33.75	31	1.1425	1.7125	1.4275	40.4425
DP527-191	75	64	69.5	120	120	120	26.5	26.75	26.625	43.5	45.25	44.375	1.9625	2.1575	2.06	45.11	47.68	46.4	19.8	20.4	20.1	3.2	3.3	3.3	8.3	8.4	8.3	1.6	1.6	1.6	2.6	2.6	2.6	66	65	65.5	92	74	83	24	20.3333	22.1667	31.25	22.3333	26.7917	1.08	0.653333	0.866667	34.56
DP527-192	69	67	68	103	104	103.5	23	23.25	23.125	35.25	35.25	35.25	1.6275	1.505	1.56625	46.17	42.7	44.43	19.7	18.8	19.2	3.3	3.2	3.3	8.2	8	8.1	1.6	1.6	1.6	2.5	2.5	2.5	69	62	65.5	81	96	88.5	22.5	24	23.25	14.5	30.75	22.625	0.3725	1.2075	0.79	25.6897
DP527-193	78	76	77	127	141	134	22.5	22.75	22.625	33	33.5	33.25	1.3625	1.865	1.61375	41.29	55.67	48.48	18.3	21.9	20.1	3.3	3.8	3.6	8	8.4	8.2	1.6	1.5	1.6	2.4	2.2	2.3	56	73	64.5	111	82	96.5	20.75	17	18.875	28.75	13	20.875	1.46	0.463333	0.961667	50.7826
DP527-194	78	74	76	132	100	116	21.5	20.5	21	37.5	21.25	29.375	1.88	0.9475	1.41375	50.13	44.59	47.36	21.8	22.3	22.1	3.4	3.6	3.5	8.7	8.6	8.7	1.6	1.6	1.6	2.6	2.4	2.5	66	67	66.5	105	96	100.5	20	19.5	19.75	23.5	30.5	27	0.99	1.3275	1.15875	42.1277
DP527-195	72	73	72.5	145	142	143.5	29	27.75	28.375	41	44	42.5	2.2175	2.115	2.16625	54.09	48.07	51.08	21.3	19.6	20.5	3.7	3.6	3.6	8.2	7.7	7.9	1.5	1.5	1.5	2.2	2.2	2.2	51	56	53.5	113	103	108	20	21.25	20.625	28.25	27.5	27.875	1.2	1.19	1.195	42.4779
DP527-196	65	75	70	132	122	127	28.25	25.75	27	59	46.5	52.75	3.1075	1.9975	2.5525	52.67	42.96	47.81	20.5	18.1	19.3	3.7	3.5	3.6	7.6	7.3	7.5	1.4	1.4	1.4	2.1	2.1	2.1	43	61	52	82	85	83.5	21	23.25	22.125	37.75	40	38.875	1.8125	1.455	1.63375	48.0132
DP527-197	66	NA	66	127	134	130.5	21.75	25.25	23.5	37.25	40.75	39	2.2275	1.965	2.09625	59.8	48.22	54.01	23.4	20	21.7	3.7	3.4	3.6	8.9	8.4	8.6	1.6	1.6	1.6	2.4	2.4	2.4	95	61	78	93	NA	93	17.5	21.5	19.5	20.25	31.5	25.875	0.6125	1.395	1.00375	30.2469
DP527-198	73	69	71	111	120	115.5	23.5	24.75	24.125	36	41.25	38.625	1.45	1.6475	1.54875	40.28	39.94	40.11	19	17.9	18.5	3.3	3.2	3.2	8	7.9	7.9	1.6	1.6	1.6	2.5	2.5	2.5	68	77	72.5	108	92	100	22.75	22.25	22.5	31.75	22.5	27.125	1.27	0.4425	0.85625	40
DP527-199	67	68	67.5	105	94	99.5	25.5	23.25	24.375	41	38.5	39.75	1.9025	2.1275	2.015	46.4	55.26	50.83	19.4	21.3	20.3	3.5	3.6	3.6	7.9	8.2	8.1	1.5	1.5	1.5	2.3	2.3	2.3	75	56	65.5	80	70	75	22	21.75	21.875	24.5	27	25.75	0.54	1.1925	0.86625	22.0408
DP527-200	60	70	65	131	132	131.5	24	23.25	23.625	41	39.5	40.25	2.0925	1.995	2.04375	51.04	50.51	50.77	21.3	20.6	20.9	3.5	3.5	3.5	8.2	8.1	8.2	1.5	1.5	1.5	2.4	2.4	2.4	52	46	49	101	76	88.5	21	21	21	26.75	11	18.875	1.1925	0.34	0.76625	44.5794
DP527-201	64	65	64.5	133	142	137.5	24.25	25.25	24.75	38.5	34.5	36.5	2.305	2.3125	2.30875	59.87	67.03	63.45	23.1	24.8	23.9	3.5	3.7	3.6	9.1	9.3	9.2	1.6	1.6	1.6	2.6	2.5	2.5	59	69	64	110	84	97	19.5	20.5	20	22.5	19.5	21	1.2125	0.885	1.04875	53.8889
DP527-202	82	72	77	54	56	55	12.5	14.5	13.5	2.5	5	3.75	0.07	0.135	0.1025	28	27	27.5	15.2	15.3	15.2	2.7	2.7	2.7	7.7	7.9	7.8	1.7	1.8	1.8	2.8	3	2.9	55	60	57.5	56	59	57.5	15.25	16.75	16	10	6.75	8.375	0.3425	0.235	0.28875	34.25
DP527-203	56	58	57	127	149	138	23.75	26.75	25.25	33	42	37.5	2.0925	2.36	2.22625	63.41	56.19	59.8	24.2	21.8	23	3.8	3.6	3.7	9	8.4	8.7	1.6	1.5	1.5	2.4	2.4	2.4	45	46	45.5	120	107	113.5	24	23	23.5	26.5	24.75	25.625	1.3525	1.1575	1.255	51.0377
DP527-204	67	67	67	122	121	121.5	25.25	25.5	25.375	38.25	41	39.625	1.8675	2.2375	2.0525	48.82	54.57	51.7	20.9	22.2	21.6	3.3	3.4	3.4	8.7	9	8.8	1.7	1.6	1.7	2.7	2.6	2.6	64	54	59	93	103	98	22.25	23	22.625	39.5	42.25	40.875	1.76	1.89	1.825	44.557
DP527-205	60	70	65	132	152	142	30.5	28	29.25	30.5	36.25	33.375	1.38	1.875	1.6275	45.25	51.72	48.49	18.4	20.3	19.3	3.4	3.6	3.5	7.5	7.9	7.7	1.5	1.5	1.5	2.2	2.2	2.2	58	54	56	123	101	112	23.75	20.75	22.25	23.25	14.75	19	1.065	0.5275	0.79625	45.8065
DP527-206	68	65	66.5	131	112	121.5	25.25	23	24.125	33	29	31	1.8225	1.525	1.67375	55.23	52.59	53.91	22	20.8	21.4	3.6	3.6	3.6	8.5	8	8.2	1.5	1.5	1.5	2.3	2.2	2.3	78	77	77.5	79	70	74.5	19	17.25	18.125	16.25	14.25	15.25	0.495	0.26	0.3775	30.4615
DP527-207	81	80	80.5	92	99	95.5	26	30	28	22.5	23.25	22.875	0.5925	0.9225	0.7575	26.33	39.68	33.01	16.5	18.8	17.6	3.1	3.3	3.2	7.8	8	7.9	1.7	1.6	1.6	2.6	2.4	2.5	63	56	59.5	86	75	80.5	20.75	20.75	20.75	26.25	26.75	26.5	0.8625	0.9825	0.9225	32.8571
DP527-208	67	73	70	148	132	140	25	24.5	24.75	34.75	35.75	35.25	2.0625	1.7725	1.9175	59.35	49.58	54.47	24.9	21.4	23.2	3.7	3.4	3.5	9.4	8.9	9.2	1.7	1.7	1.7	2.6	2.6	2.6	65	79	72	111	92	101.5	20.25	17	18.625	29.5	20.5	25	1.29	0.565	0.9275	43.7288
DP527-209	79	77	78	151	123	137	23.25	25.75	24.5	35.75	28.5	32.125	1.4725	0.9875	1.23	41.19	34.65	37.92	18.7	16.8	17.7	3.3	3.1	3.2	8.2	7.7	7.9	1.6	1.6	1.6	2.5	2.5	2.5	61	82	71.5	98	99	98.5	20.75	21.25	21	25.25	14.5	19.875	1.045	0.3625	0.70375	41.3861
DP527-210	75	69	72	129	140	134.5	26.75	29.25	28	44.5	46	45.25	2.04	2.3925	2.21625	45.84	52.01	48.93	19.4	20.8	20.1	3.3	3.4	3.3	8.5	8.6	8.5	1.7	1.6	1.6	2.6	2.5	2.6	62	61	61.5	119	119	119	21	23	22	24.25	27	25.625	1.255	1.3125	1.28375	51.7526
DP527-211	77	81	79	139	138	138.5	27.75	24.75	26.25	40.25	39	39.625	1.7425	2.0025	1.8725	43.29	51.35	47.32	18.4	19.6	19	3.3	3.5	3.4	7.9	7.9	7.9	1.6	1.5	1.5	2.4	2.3	2.3	74	60	67	114	115	114.5	19.5	20.5	20	28.25	27	27.625	0.7975	1.0625	0.93	28.2301
DP527-212	80	67	73.5	115	117	116	22.5	23	22.75	27.25	37.5	32.375	0.84	1.77	1.305	30.83	47.2	39.01	16.5	19.8	18.1	2.9	3.3	3.1	7.9	8.3	8.1	1.7	1.6	1.7	2.7	2.6	2.7	74	63	68.5	63	88	75.5	16.75	18.25	17.5	8	25	16.5	0.23	0.9775	0.60375	28.75
DP527-213	73	74	73.5	144	125	134.5	27.5	26.75	27.125	34.25	23.5	28.875	1.77	0.99	1.38	51.68	42.13	46.9	20.8	19	19.9	3.6	3.4	3.5	8.3	8.1	8.2	1.5	1.6	1.6	2.3	2.4	2.4	69	73	71	130	111	120.5	23.5	23.75	23.625	6	10.5	8.25	0.2075	0.42	0.31375	34.5833
DP527-214	67	71	69	126	126	126	23.5	26	24.75	35.5	37	36.25	1.965	1.745	1.855	55.35	47.16	51.26	21.1	19.1	20.1	3.8	3.5	3.7	7.7	7.7	7.7	1.4	1.5	1.4	2	2.2	2.1	76	66	71	89	95	92	17	22.75	19.875	16.25	32.25	24.25	0.685	1.205	0.945	42.1538
DP527-215	70	74	72	108	121	114.5	23.25	25.5	24.375	35.5	40	37.75	1.74	1.705	1.7225	49.01	42.63	45.82	20.5	19.6	20.1	3.5	3.5	3.5	8.4	8.3	8.3	1.6	1.6	1.6	2.4	2.4	2.4	66	59	62.5	114	95	104.5	18.5	22	20.25	26.5	27	26.75	0.535	0.55	0.5425	20.1887
DP527-216	93	76	84.5	86	131	108.5	17	22.25	19.625	22	31.5	26.75	0.78	1.4925	1.13625	35.45	47.38	41.42	16	20	18	3.2	3.7	3.4	7.2	7.9	7.5	1.5	1.5	1.5	2.3	2.1	2.2	76	56	66	96	103	99.5	18.75	19	18.875	27.75	29.6667	28.7083	0.9475	1.01333	0.980417	34.1441
DP527-217	81	77	79	177	169	173	26.5	26.75	26.625	40.25	41.25	40.75	1.825	1.61	1.7175	45.34	39.03	42.19	18.7	16.9	17.8	3.4	3.2	3.3	7.7	7.5	7.6	1.5	1.5	1.5	2.3	2.4	2.4	78	72	75	112	98	105	18.5	18.5	18.5	24.75	15.25	20	0.8375	0.4375	0.6375	33.8384
DP527-218	90	92	91	114	113	113.5	28.5	29.6667	29.0833	18.5	27.6667	23.0833	0.8	1.29667	1.04833	43.24	46.87	45.06	20.1	19.8	20	3.5	3.6	3.5	8.1	8	8	1.6	1.5	1.5	2.3	2.3	2.3	66	NA	66	75	76	75.5	26	22.75	24.375	24.5	8	16.25	0.8575	0.2775	0.5675	35
DP527-219	80	66	73	135	122	128.5	26.5	29	27.75	24.5	24.25	24.375	0.9125	0.9875	0.95	37.24	40.72	38.98	18.6	19.4	19	3.3	3.5	3.4	7.9	7.7	7.8	1.6	1.5	1.5	2.4	2.2	2.3	66	69	67.5	114	97	105.5	22	20.75	21.375	25.25	19.25	22.25	1.1225	0.775	0.94875	44.4554
[truncated: 26 more columns]
